# Supplementary material
Source: PubMed Central journal article supplement (PMC5300750)
Supplement: NIHMS847779-supplement-Supplementary.pdf [file NIHMS847779-supplement-Supplementary.pdf]

## **Supplementary Methods**

### **Control Datasets**

Shared controls from the United States (NARAC), Sweden (EIRA), Spain and Netherlands were provided by the Rheumatoid Arthritis Consortium International (RACI),[1] with control samples from the United Kingdom provided by the Wellcome Trust Case Control Consortium (WTCCC).[2] Controls from Italy, Norway, Belgium and France were provided by the International Multiple Sclerosis Genetics Consortium (IMSGC).[3] Polish and Hungarian controls were provided from the Celiac Consortium,[4] and German controls from the KORAgen consortium.[5]

### **Genotyping and quality control**

Samples were clustered together and called using the GenTrain2 clustering algorithm in the GenomeStudio Data Analysis Software package with the Immuno\_BeadChip\_1149691\_B.bpm manifest file (NCBI Build 36). Poorly performing assays were identified as those with call rate <98% and a cluster separation score of <0.4. Samples were then excluded based on a call rate <98%, those with discordant genotype/reported sex and extreme heterozygosity. Duplicate individuals or first- or second-degree relatives were also removed using identity by descent analysis. Principal components analysis (PCA) was performed on an independent subset of SNPs using EIGENSOFT v4.2 to identify ancestry outliers.[6, 7] Further quality control excluded SNPs based on minor allele frequency (<5%), deviation from Hardy-Weinberg equilibrium in controls ( $p < 0.001$ ) and differences in missing data between cases and controls ( $p < 0.01$ ).

### **Functional annotation**

Evidence for functional effects was investigated using for the lead SNP in each region, and SNPs in high linkage disequilibrium (LD) ( $r^2 \geq 0.9$ ) using 1000 Genomes data. Published expression quantitative trait loci (eQTL) studies aggregated in three databases were interrogated;

RegulomeDB,[8] Genevar,[9] and the Pritchard lab eQTL browser (<http://eqtl.uchicago.edu/cgi-bin/gbrowse/eqtl/>). Evidence of eQTLs is reported when linked to expression of a gene in cells with an immune function (Lymphoblastoid and Monocytes).

Potentially functionally important residues was assessed by the online tools PolyPhen-2,[10] SIFT,[11] and phastCons17-way,[12] which use the physical properties of the amino acids, sequence homology and conservation to assess the impact of an amino acid substitution.

### **MHC imputation and association analysis**

Classical human leukocyte antigen (*HLA*) alleles and corresponding amino acid sequences were imputed using SNP2HLA using reference data collected by the Type 1 Diabetes Genetics Consortium.[13] Analysis was performed on the dosage of variants passing the quality control thresholds; information score  $\geq 0.9$  and minor allele frequency  $\geq 0.01$ . Single-test association was performed for HLA alleles, as well as omnibus tests for amino acids. A logistic regression assuming an additive model was used to test for association and generate odds ratios, with the top ten principal components included as covariates to account for population stratification. To test for independent effects, a forward stepwise logistic regression was used conditional on the variant of interest by including it as a covariate. Classical 4-digit HLA alleles were preferentially reported, unless an amino acid association explained more risk than HLA alleles alone. Significance was defined as  $p < 6.8 \times 10^{-6}$  based on a Bonferroni correction of the 7,323 makers imputed by SNP2HLA.[14]

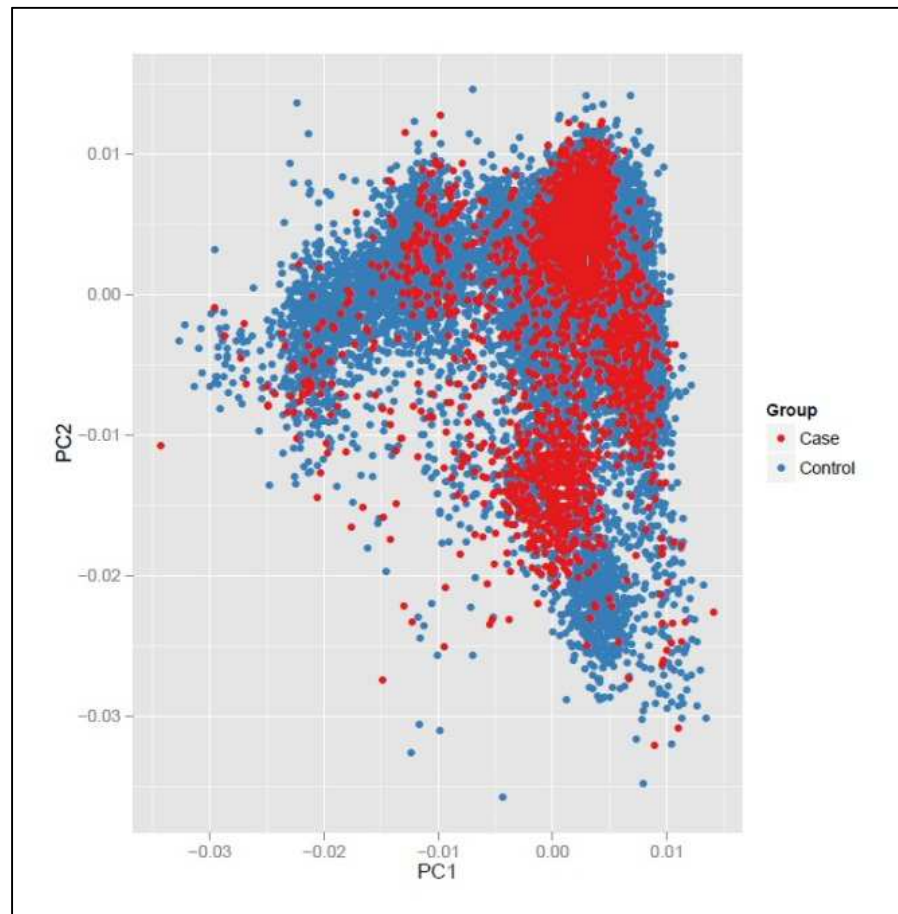

**Figure S1: First two principal components of 2,566 IIM cases and controls after QC.**

A scaled  $\lambda_{GC_{1000}}$  of 1.05 on a null set of SNPs indicates that the cases and controls are well matched (1.23 unscaled).

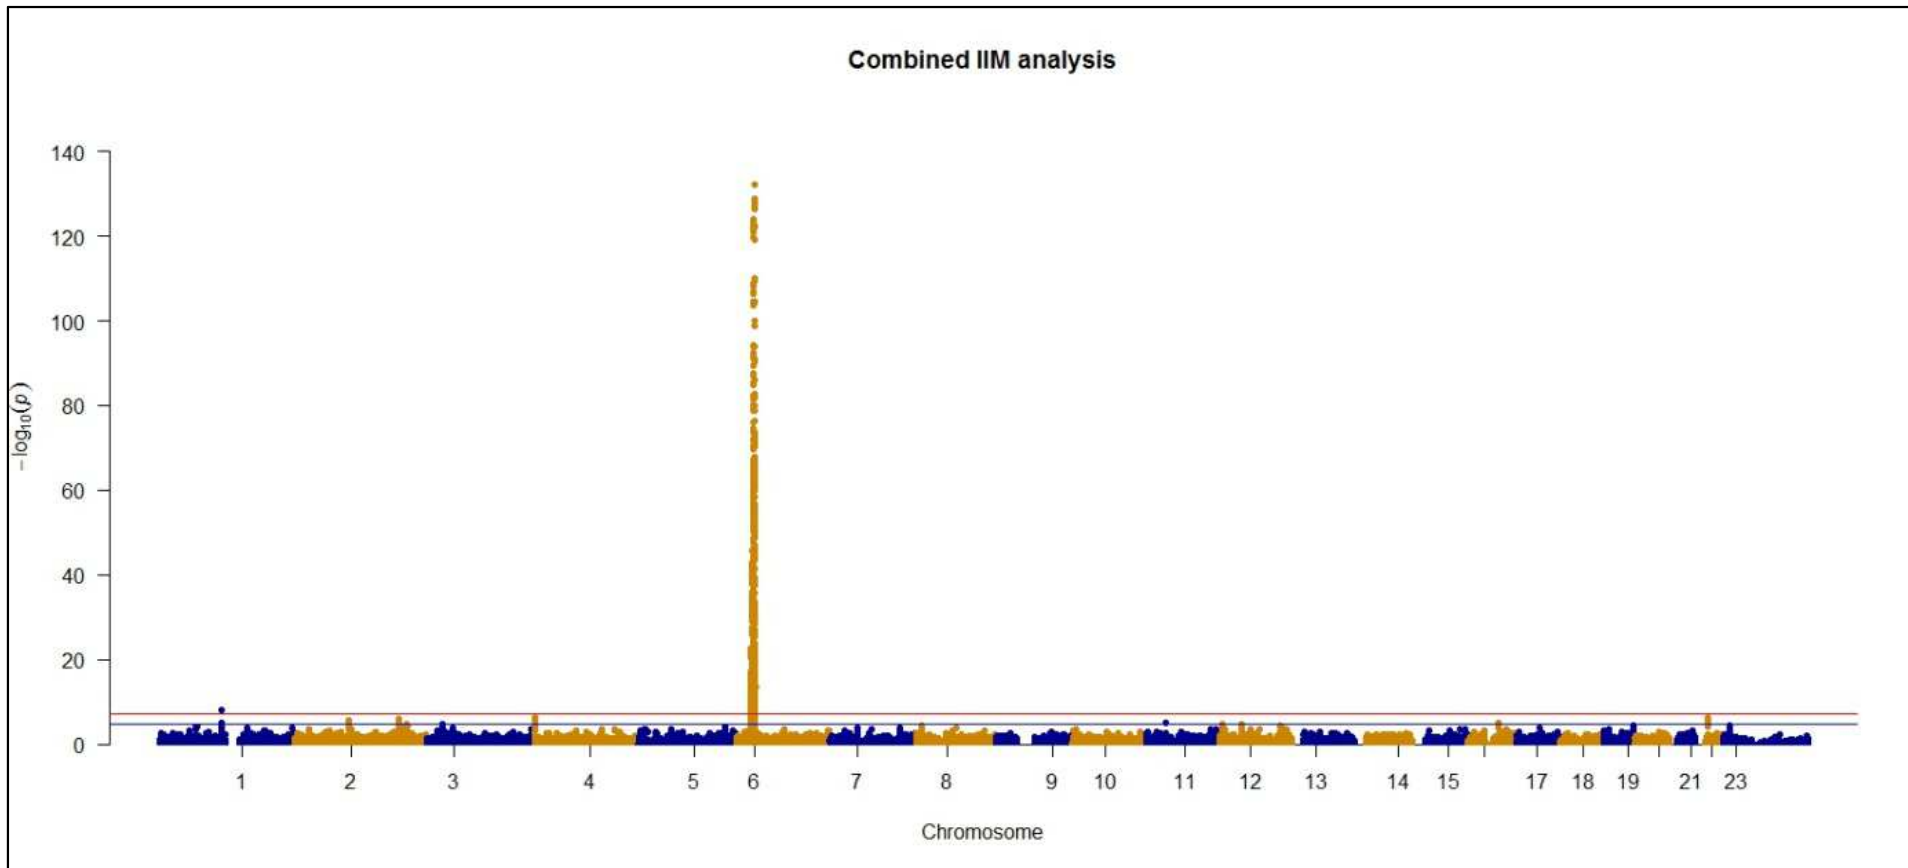

**Figure S2: Manhattan plot with the combined IIM cohort.**

Analysis of 2,566 IIM cases and 15,651 controls. The red and blue lines represent genome-wide level of significance ( $p=5 \times 10^{-8}$ ) and suggestive significance ( $p=2.25 \times 10^{-5}$ ) respectively

### STAT4 Region in IIM

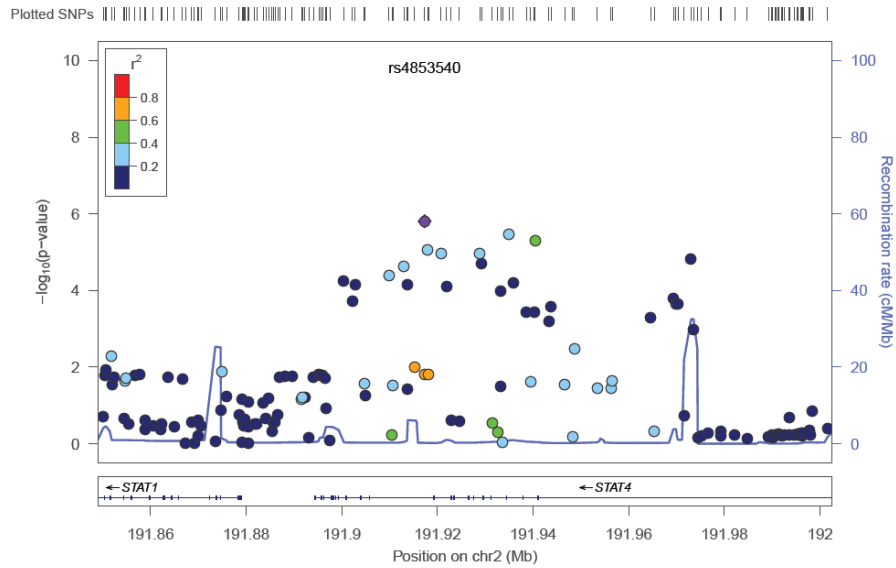

### STAT4 Region in IIM – conditional on rs4853540

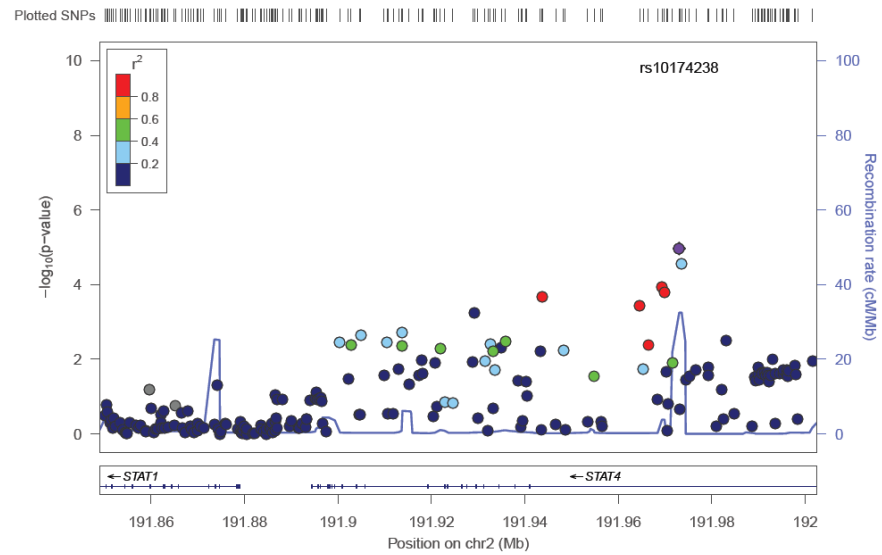

### STAT4 Region in IIM – conditional on rs4853540 and rs10174238

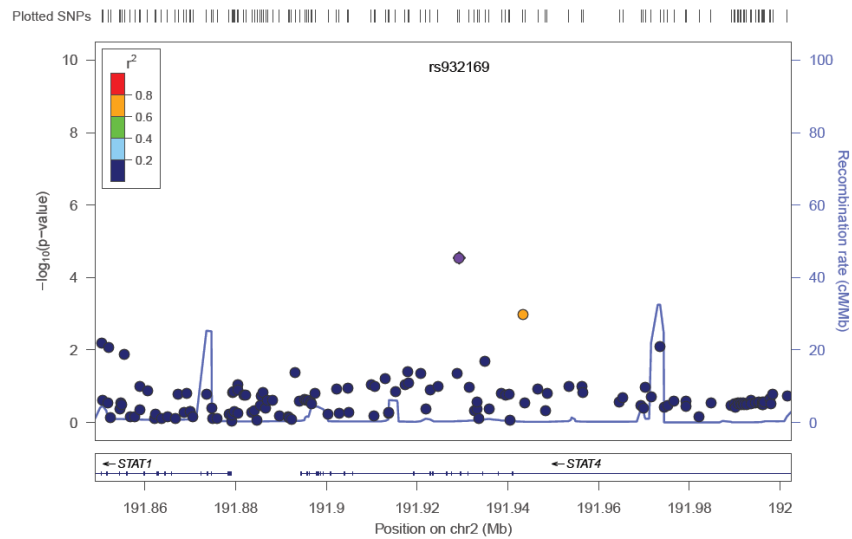

**Figure S3: Stepwise logistic regression analysis in the *STAT4* region.**

Independent effects within *STAT4* are shown with rs4853540, rs10174238 and rs932169

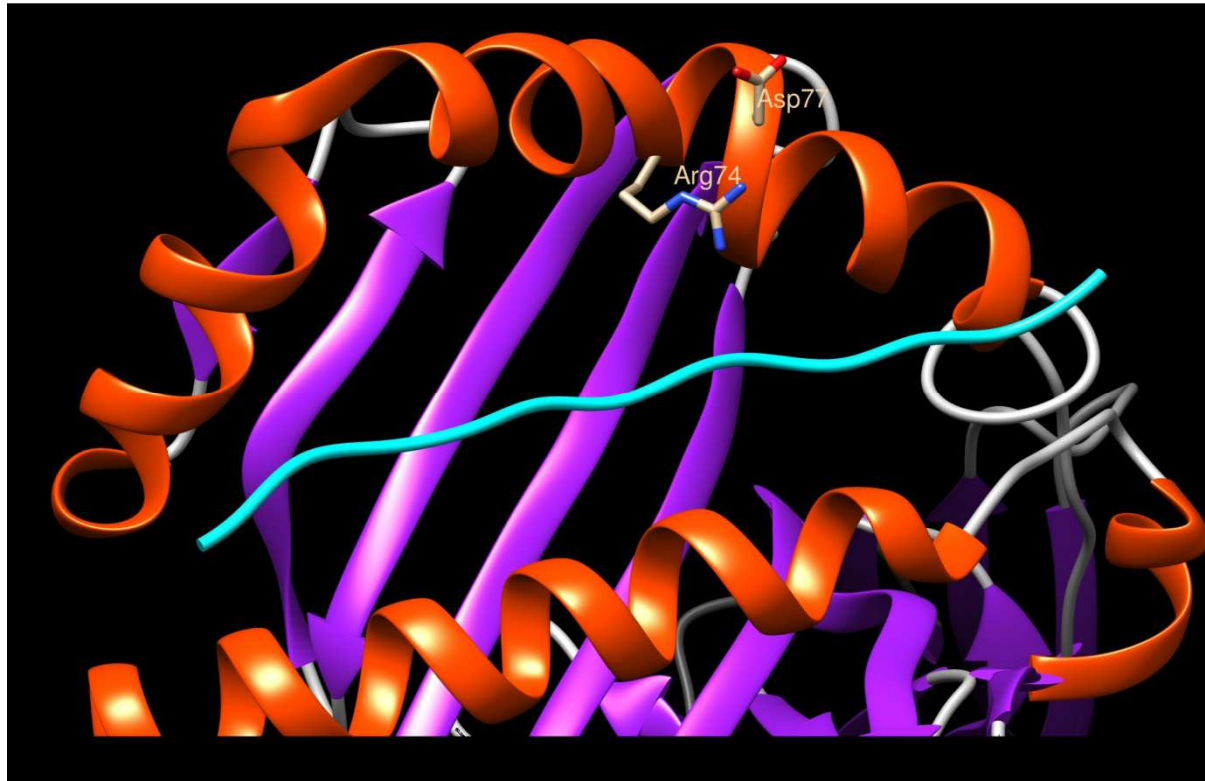

**Figure S4: The location of Asp-77 and Arg-74 within the HLA-DRB1 molecule**

HLA-DRB1\*03:01 is associated with IIM, PM and JDM. Amino acids Asp-77 and Arg-74 are associated at a similar level of significance. This figure shows the location of these amino acids within the HLA-DRB1 molecule.

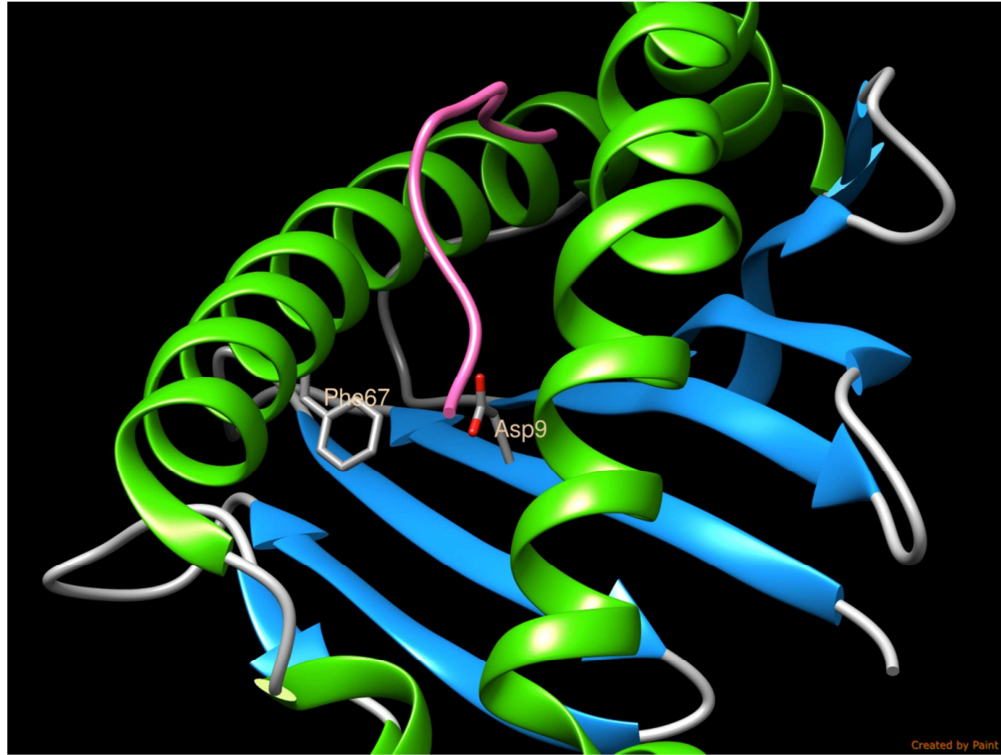

**Figure S5: The location of Phe-67 and Asp-9 within the HLA-B molecule**

HLA-B\*08:01 is consistently associated with IIM. Amino acids Phe-67 and Asp-9 are associated at a similar level of significance. This figure shows the location of these amino acids within the HLA-B molecule.

**Table S1: Sample numbers of IIM patients included in the combined ImmunoChip analysis**

| <b>Diagnosis</b>         | <b>Number</b> |
|--------------------------|---------------|
| Anti-synthetase syndrome | 11            |
| Dermatomyositis          | 879           |
| Inclusion Body Myositis  | 252           |
| Juvenile Dermatomyositis | 481           |
| Juvenile Polymyositis    | 12            |
| Polymyositis             | 931           |
| <b>Total</b>             | <b>2,566</b>  |

Antisynthetase syndrome patients were included in the combined analysis, however clinical data was not available to classify as PM or DM. These were not included in the clinical subgroup analysis.



**Table S2: Overlap of IIM associations with other autoimmune diseases**

| Analysis Subgroup      | Gene Region        | Lead SNP in IIM        | Disease Overlap | Reported SNP | P-value                 | Alleles | OR                 | LD ( $r^2$ ) with IIM association | Reference |
|------------------------|--------------------|------------------------|-----------------|--------------|-------------------------|---------|--------------------|-----------------------------------|-----------|
| IIM/PM                 | <i>PTPN22</i>      | rs2476601              |                 |              | 7.22x10 <sup>-9</sup>   | G>A     | IIM=1.32 / PM=1.58 |                                   |           |
|                        |                    |                        | SLE             | rs2476601    | 3.40x10 <sup>-12</sup>  | G>A     | 1.35               | 1                                 | [15]      |
|                        |                    |                        | CRO             | rs6679677    | 2.03x10 <sup>-15</sup>  | C>A     | 0.84               | 0.92                              | [16]      |
|                        |                    |                        | JIA             | rs6679677    | 3.19x10 <sup>-25</sup>  | C>A     | 1.59               | 0.92                              | [17]      |
|                        |                    |                        | ATD             | rs2476601    | 9.69x10 <sup>-23</sup>  | G>A     | 1.63               | 1                                 | [18]      |
|                        |                    |                        | IBD             | rs6679677    | 3.15x10 <sup>-3</sup>   | C>A     | 0.94               | 1                                 | [16]      |
|                        |                    |                        | T1D             | rs2476601    | 5.93x10 <sup>-80</sup>  | G>A     | 1.96               | 1                                 | [19]      |
|                        |                    |                        | SSC             | rs76853721   | 7.10x10 <sup>-3</sup>   | G>A     | 0.62               | 1                                 | [20]      |
|                        |                    |                        | RA              | rs2476601    | 6.60x10 <sup>-170</sup> | G>A     | 1.8                | 1                                 | [21]      |
| VIT                    | rs2476601          | 6.10x10 <sup>-13</sup> | G>A             | NR           | 1                       | [22]    |                    |                                   |           |
| IIM                    | <i>YDJC</i>        | rs5754467              | CEL             | rs4821124    | 4.67x10 <sup>-7</sup>   | A>G     | 1.21               | 0.94                              | [4]       |
|                        |                    |                        | SLE             | rs5754217    | 5.70x10 <sup>-11</sup>  | T>C     | 1.16               | 0.94                              | [15]      |
|                        |                    |                        | PSO             | rs4821124    | 2.30x10 <sup>-6</sup>   | G>T     | 1.2                | 0.94                              | [23]      |
|                        |                    |                        | CRO             | rs2266959    | 3.80x10 <sup>-8</sup>   | T>C     | 1.13               | 0.94                              | [16]      |
|                        |                    |                        | JIA             | rs2266959    | 3.89x10 <sup>-16</sup>  | G>T     | 1.13               | 0.94                              | [17]      |
|                        |                    |                        | UC              | rs2266959    | 6.20x10 <sup>-9</sup>   | C>A     | 1.24               | 0.94                              | [16]      |
|                        |                    |                        | IBD             | rs2266959    | 4.65x10 <sup>-7</sup>   | G>T     | 1.08               | 0.94                              | [16]      |
|                        |                    |                        | RA              | rs2266959    | 1.39x10 <sup>-16</sup>  | G>T     | 1.11               | 0.90                              | [24]      |
| RA                     | rs5754217          | 4.80x10 <sup>-5</sup>  | G>T             | 1.09         | 0.90                    | [24]    |                    |                                   |           |
| IIM                    | <i>STAT4</i>       | rs4853540              | CEL             | rs6715106    | 1.57x10 <sup>-6</sup>   | G>T     | 0.83               | 0.37                              | [4]       |
|                        |                    |                        | CRO             | rs1517352    | 8.40x10 <sup>-9</sup>   | A>G     | 0.79               | 0.42                              | [16]      |
|                        |                    |                        | UC              | rs1517352    | 1.93x10 <sup>-10</sup>  | C>A     | 0.91               | 0.42                              | [16]      |
|                        |                    |                        | IBD             | rs1517352    | 1.55x10 <sup>-6</sup>   | C>A     | 0.95               | 0.42                              | [16]      |
| IBD                    | rs1517352          | 3.28x10 <sup>-11</sup> | C>A             | 0.93         | 0.42                    | [16]    |                    |                                   |           |
| IIM                    | <i>STAT4</i>       | rs10174238             | SLE             | rs7574865    | 1.08x10 <sup>-5</sup>   | A>G     | 1.17               | 0.79                              | [15]      |
|                        |                    |                        | PBC             | rs7574865    | 1.40x10 <sup>-41</sup>  | G>T     | 1.57               | 0.79                              | [25]      |
|                        |                    |                        | JIA             | rs7574865    | 1.38x10 <sup>-13</sup>  | G>T     | 1.31               | 0.79                              | [17]      |
|                        |                    |                        | RA              | rs10174238   | 1.28x10 <sup>-13</sup>  | A>G     | 1.29               | 1                                 | [21]      |
|                        |                    |                        | SLE             | rs11889341   | 3.60x10 <sup>-19</sup>  | C>T     | 1.13               | 0.75                              | [26]      |
| SLE                    | rs7574865          | 5.10x10 <sup>-9</sup>  | T>G             | 1.51         | 0.79                    | [26]    |                    |                                   |           |
| IIM                    | <i>STAT4</i>       | rs932169               | PBC             | rs3024921    | 2.88x10 <sup>-5</sup>   | G>C     | 1.25               | 0.62                              | [25]      |
| 2.59x10 <sup>-18</sup> | A>T                | 1.62                   |                 |              |                         |         |                    |                                   |           |
| IIM                    | <i>CD28</i>        | rs3116494              | PSC             | rs7426056    | 1.54x10 <sup>-5</sup>   | A>G     | 1.16               | 0.91                              | [27]      |
|                        |                    |                        | RA              | rs1980422    | 1.89x10 <sup>-20</sup>  | G>A     | 1.3                | 0.91                              | [21]      |
|                        |                    |                        | RA              | rs1980422    | 3.00x10 <sup>-14</sup>  | T>C     | 1.12               | 0.91                              | [21]      |
| PM                     | <i>SL26A1/IDUA</i> | rs4690220              | SJO             | rs4690326    | 7.47x10 <sup>-6</sup>   | A>G     | 1.25               | 0.72                              | [28]      |
| 1.05x10 <sup>-5</sup>  | C>A                | 0.84                   |                 |              |                         |         |                    |                                   |           |
| PM                     | <i>RGS1</i>        | rs7535818              | T1D             | rs2209014    | 1.37x10 <sup>-5</sup>   | A>G     | 0.74               | 0.69                              | [19]      |
|                        |                    |                        | T1D             | rs2816316    | 2.16x10 <sup>-4</sup>   | A>G     | 0.89               | 1                                 | [29]      |
|                        |                    |                        | CEL             | rs2816316    | 3.10x10 <sup>-5</sup>   | A>C     | NR                 | 1                                 | [4]       |
|                        |                    |                        | MS              | rs1359062    | 2.50x10 <sup>-25</sup>  | G>C     | 0.77               | 0.95                              | [30]      |
|                        |                    |                        | MS              | rs1359062    | 2.30x10 <sup>-8</sup>   | A>G     | 0.89               | 1                                 | [3]       |
|                        |                    |                        | CEL             | rs1359062    | 4.80x10 <sup>-20</sup>  | C>G     | 0.87               | 0.95                              | [31]      |
| CEL                    | rs2816316          | 2.20x10 <sup>-17</sup> | A>C             | 0.8          | 1                       | [31]    |                    |                                   |           |
| DM+JDM                 | <i>GSDMB</i>       | rs1008723              | PBC             | rs8067378    | 9.05x10 <sup>-6</sup>   | G>T     | 1.20               | 1                                 | [25]      |
|                        |                    |                        | CRO             | rs12946510   | 6.05x10 <sup>-14</sup>  | A>G     | 0.79               | 0.77                              | [16]      |
|                        |                    |                        | UC              | rs12946510   | 3.58x10 <sup>-25</sup>  | C>T     | 1.15               | 0.77                              | [16]      |
|                        |                    |                        | IBD             | rs12946510   | 3.39x10 <sup>-26</sup>  | C>T     | 1.16               | 0.77                              | [16]      |
|                        |                    |                        | UC              | rs12946510   | 4.10x10 <sup>-38</sup>  | C>T     | 1.16               | 0.77                              | [16]      |
|                        |                    |                        | T1D             | rs2872507    | 5.44x10 <sup>-11</sup>  | G>A     | 1.15               | 0.90                              | [32]      |
|                        |                    |                        | T1D             | rs12453507   | 4.10x10 <sup>-11</sup>  | G>A     | 1.15               | 0.90                              | [33]      |
|                        |                    |                        | RA              | rs12453507   | 1.00x10 <sup>-8</sup>   | G>C     | 0.9                | 0.94                              | [1]       |
| RA                     | rs2872507          | 2.80x10 <sup>-9</sup>  | G>A             | 1.1          | 0.90                    | [1]     |                    |                                   |           |
| MS                     | rs12946510         | 2.90x10 <sup>-9</sup>  | G>A             | 1.07         | 0.77                    | [3]     |                    |                                   |           |

Overlap reported between associations in IIM and the lead association in another autoimmune disease (as reported on [www.immunobase.org](http://www.immunobase.org)). Overlap reported where LD ( $r^2 > 0.7$ ), except for *STAT4* independent effects where moderate LD is also reported. Alleles and odds ratios reported where available and coloured as risk (red) and

protective (blue). ATD – Autoimmune Thyroid Disease, CEL – Celiac Disease, CRO - Crohn's disease, IBD – Inflammatory Bowel Disease, JIA – Juvenile Idiopathic Arthritis, MAF – minor allele frequency, MS – Multiple Sclerosis, NR - not reported, OR – Odds ratio, PBC – Primary Biliary Cirrhosis, PSC - Primary Sclerosing Cholangitis, PSO – Psoriasis, RA – Rheumatoid Arthritis, SJO - Sjogren Syndrome, SLE – Systemic Lupus Erythematosus, SSC - Systemic Scleroderma, T1D – Type 1 Diabetes, UC - Ulcerative colitis, VIT – Vitiligo

**Table S3: Total ImmunoChip associations, stratified by PM, DM and JDM, and IBM**

| Association       | SNP        | Total IIM<br>n=2,566 $\lambda_{GC_{null}}=1.05$ |                  | Polymyositis<br>n=931 $\lambda_{GC_{null}}=1.05$ |                  | Adult and Juvenile<br>Dermatomyositis<br>n=1,360 $\lambda_{GC_{null}}=1.00$ |                  | Inclusion Body Myositis<br>n=252 $\lambda_{GC_{null}}=1.06$ |                  |
|-------------------|------------|-------------------------------------------------|------------------|--------------------------------------------------|------------------|-----------------------------------------------------------------------------|------------------|-------------------------------------------------------------|------------------|
|                   |            | p-value                                         | OR (95% CI)      | p-value                                          | OR (95% CI)      | p-value                                                                     | OR (95% CI)      | p-value                                                     | OR (95% CI)      |
| PTPN22            | rs2476601  | 7.22x10 <sup>-9</sup>                           | 1.32 (1.20-1.45) | 7.90x10 <sup>-11</sup>                           | 1.58 (1.38-1.81) | 0.2                                                                         | 1.09 (0.96-1.25) | 3.67x10 <sup>-5</sup>                                       | 1.74 (1.34-2.26) |
| YDJC              | rs5754467  | 4.67x10 <sup>-7</sup>                           | 1.21 (1.12-1.30) | 0.0003                                           | 1.23 (1.10-1.38) | 0.005                                                                       | 1.15 (1.04-1.27) | 0.01                                                        | 1.31 (1.06-1.62) |
| DGKQ              | rs6599390  | 6.48x10 <sup>-7</sup>                           | 0.85 (0.79-0.90) | 1.63x10 <sup>-5*</sup>                           | 0.79 (0.71-0.88) | 0.009                                                                       | 0.89 (0.82-0.97) | 0.005                                                       | 0.75 (0.61-0.92) |
| STAT4             | rs4853540  | 1.57x10 <sup>-6</sup>                           | 0.83 (0.77-0.89) | 0.002                                            | 0.83 (0.73-0.93) | 3.07x10 <sup>-5</sup>                                                       | 0.80 (0.72-0.89) | 0.7                                                         | 0.95 (0.76-1.20) |
| STAT4             | rs10174238 | 1.52x10 <sup>-5</sup>                           | 1.17 (1.09-1.25) | 0.0004                                           | 1.22 (1.09-1.36) | 0.008                                                                       | 1.14 (1.03-1.25) | 0.4                                                         | 1.09 (0.88-1.35) |
| STAT4             | rs932169   | 1.99x10 <sup>-5</sup>                           | 1.25 (1.13-1.38) | 2.42x10 <sup>-5</sup>                            | 1.39 (1.19-1.62) | 0.02                                                                        | 1.18 (1.03-1.35) | 0.3                                                         | 1.19 (0.87-1.62) |
| MGAT4A            | rs10189330 | 2.68x10 <sup>-6</sup>                           | 1.16 (1.09-1.23) | 0.0005                                           | 1.19 (1.08-1.30) | 0.01                                                                        | 1.11 (1.03-1.20) | 0.005                                                       | 1.30 (1.08-1.56) |
| CCL17             | rs223900   | 9.97x10 <sup>-6</sup>                           | 1.17 (1.09-1.25) | 0.0004                                           | 1.21 (1.09-1.35) | 0.005                                                                       | 1.14 (1.04-1.25) | 0.06                                                        | 1.21 (0.99-1.48) |
| EOMES             | rs376072   | 1.45x10 <sup>-5</sup>                           | 0.86 (0.80-0.92) | 0.004                                            | 0.85 (0.76-0.95) | 0.002                                                                       | 0.86 (0.79-0.95) | 0.05                                                        | 0.81 (0.66-1.00) |
| CD28              | rs3116494  | 1.54x10 <sup>-5</sup>                           | 1.16 (1.09-1.24) | 0.01                                             | 1.14 (1.03-1.27) | 0.0008                                                                      | 1.17 (1.07-1.27) | 0.02                                                        | 1.28 (1.05-1.56) |
| RPL31P10          | rs11064180 | 1.61x10 <sup>-5</sup>                           | 0.87 (0.82-0.93) | 0.01                                             | 0.89 (0.80-0.98) | 5.47x10 <sup>-5</sup>                                                       | 0.84 (0.78-0.92) | 0.6                                                         | 0.95 (0.79-1.14) |
| PRR5L   TRAF6     | rs570676   | 9.42x10 <sup>-6</sup>                           | 0.87 (0.82-0.92) | 0.01                                             | 0.88 (0.80-0.98) | 2.67x10 <sup>-5</sup>                                                       | 0.84 (0.77-0.91) | 1                                                           | 1.00 (0.83-1.21) |
| UBE3B   MMAB      | rs7956536  | 0.01                                            | 0.92 (0.87-0.98) | 3.66x10 <sup>-6</sup>                            | 0.80 (0.72-0.88) | 0.7                                                                         | 1.02 (0.94-1.10) | 0.3                                                         | 0.91 (0.76-1.09) |
| NAB1              | rs2286896  | 0.008                                           | 1.12 (1.03-1.22) | 3.76x10 <sup>-6</sup>                            | 1.35 (1.19-1.53) | 0.5                                                                         | 0.96 (0.86-1.09) | 0.2                                                         | 1.19 (0.92-1.54) |
| IL18R1            | rs1420095  | 0.0003                                          | 0.81 (0.72-0.91) | 6.16x10 <sup>-6</sup>                            | 0.63 (0.52-0.77) | 0.2                                                                         | 0.91 (0.79-1.05) | 0.5                                                         | 0.88 (0.63-1.24) |
| SLC26A1   IDUA    | rs4690220  | 8.05x10 <sup>-7*</sup>                          | 1.17 (1.10-1.24) | 7.47x10 <sup>-6</sup>                            | 1.25 (1.13-1.37) | 0.009                                                                       | 1.12 (1.03-1.21) | 0.08                                                        | 1.18 (0.98-1.41) |
| RGS1              | rs7535818  | 0.005                                           | 0.89 (0.82-0.97) | 1.37x10 <sup>-5</sup>                            | 0.74 (0.65-0.85) | 0.2                                                                         | 0.93 (0.84-1.03) | 0.05                                                        | 1.24 (1.00-1.54) |
| LOC728073   RPL38 | rs9905921  | 1.77x10 <sup>-8*</sup>                          | 1.19 (1.12-1.26) | 2.01x10 <sup>-6</sup>                            | 1.26 (1.14-1.38) | 0.002                                                                       | 1.13 (1.05-1.23) | 0.005                                                       | 1.30 (1.08-1.56) |
| FAM167A   BLK     | rs17799348 | 3.92x10 <sup>-5</sup>                           | 0.88 (0.82-0.93) | 4.13x10 <sup>-6</sup>                            | 0.79 (0.71-0.87) | 0.03                                                                        | 0.91 (0.84-0.99) | 1                                                           | 1.01 (0.84-1.21) |
| GSDMB             | rs1008723  | 0.02209                                         | 1.07 (1.01-1.14) | 0.4                                              | 1.05 (0.95-1.15) | 9.05x10 <sup>-6</sup>                                                       | 1.20 (1.11-1.30) | 1.80x10 <sup>-5</sup>                                       | 1.50 (1.24-1.80) |
| ROPN1L   ANKRD33B | rs4702698  | 0.0004                                          | 1.13 (1.06-1.20) | 0.5                                              | 1.04 (0.94-1.15) | 4.77x10 <sup>-6</sup>                                                       | 1.22 (1.12-1.33) | 0.7                                                         | 0.96 (0.78-1.17) |
| PTTG1   ATP10B    | rs4921293  | 7.52x10 <sup>-5</sup>                           | 1.14 (1.07-1.21) | 0.1                                              | 1.08 (0.98-1.19) | 8.27x10 <sup>-6</sup>                                                       | 1.21 (1.11-1.31) | 0.5                                                         | 0.94 (0.77-1.14) |

Analysis of all IIM, PM, and DM and JDM associations, stratified by clinical subgroup. Analysis includes 2,566 IIM cases, 931 PM cases, and 1,360 DM and JDM cases, compared to 15,651 controls. 252 IBM cases were matched to a subset of 6,270 controls. \*Association removed during QC, but included here for comparison.

**Table S4 - HLA Imputation in the combined IIM cohort**

HLA alleles and amino acids reaching significance ( $p < 6.8 \times 10^{-6}$ ) in the combined IIM analysis (n=2,566)

| Gene     | Allele (HLA) / Amino acid (AA) | P-value   |
|----------|--------------------------------|-----------|
| HLA_DRB1 | HLA_DRB1_03                    | 6.63E-135 |
| DRB1     | AA_DRB1_77                     | 1.11E-134 |
| HLA_DRB1 | HLA_DRB1_0301                  | 2.58E-134 |
| DRB1     | AA_DRB1_74                     | 5.86E-133 |
| HLA_DQB1 | HLA_DQB1_0201                  | 2.01E-132 |
| HLA_B    | HLA_B_08                       | 1.92E-122 |
| HLA_B    | HLA_B_0801                     | 2.08E-122 |
| B        | AA_B_9                         | 9.36E-118 |
| DRB1     | AA_DRB1_26                     | 1.52E-117 |
| HLA_C    | HLA_C_0701                     | 9.04E-89  |
| C        | AA_C_66                        | 7.74E-79  |
| DQB1     | AA_DQB1_71                     | 1.93E-77  |
| DQB1     | AA_DQB1_74                     | 5.08E-77  |
| DQB1     | AA_DQB1_67                     | 3.82E-75  |
| DQB1     | AA_DQB1_66                     | 3.84E-75  |
| HLA_DQB1 | HLA_DQB1_02                    | 4.90E-73  |
| DQB1     | AA_DQB1_28                     | 9.03E-73  |
| DQB1     | AA_DQB1_46                     | 9.23E-73  |
| DQB1     | AA_DQB1_52                     | 9.25E-73  |
| DQB1     | AA_DQB1_47                     | 9.27E-73  |
| DQB1     | AA_DQB1_30                     | 1.14E-72  |
| DQB1     | AA_DQB1_37                     | 3.52E-71  |
| DRB1     | AA_DRB1_37                     | 4.32E-71  |
| DQB1     | AA_DQB1_55                     | 1.98E-70  |
| DQB1     | AA_DQB1_-10                    | 3.39E-70  |
| DRB1     | AA_DRB1_71                     | 9.32E-68  |
| DQA1     | AA_DQA1_51                     | 8.79E-66  |
| DQA1     | AA_DQA1_40                     | 8.79E-66  |
| B        | AA_B_67                        | 3.58E-65  |
| DQA1     | AA_DQA1_47                     | 1.38E-64  |
| DQA1     | AA_DQA1_50                     | 3.25E-64  |
| DQA1     | AA_DQA1_53                     | 3.32E-64  |
| DQA1     | AA_DQA1_75                     | 8.14E-63  |
| HLA_DQA1 | HLA_DQA1_0501                  | 8.83E-63  |
| HLA_DQA1 | HLA_DQA1_05                    | 8.84E-63  |
| DQA1     | AA_DQA1_107                    | 3.92E-62  |
| DQA1     | AA_DQA1_163                    | 5.55E-62  |
| DQA1     | AA_DQA1_161                    | 5.66E-62  |
| DQA1     | AA_DQA1_156                    | 5.68E-62  |
| B        | AA_B_156                       | 3.78E-61  |

|          |               |          |
|----------|---------------|----------|
| DQA1     | AA_DQA1_175   | 1.13E-60 |
| DRB1     | AA_DRB1_32    | 1.37E-57 |
| DQB1     | AA_DQB1_75    | 2.43E-56 |
| DQB1     | AA_DQB1_57    | 4.77E-55 |
| B        | AA_B_163      | 4.55E-54 |
| DRB1     | AA_DRB1_73    | 6.07E-53 |
| DQB1     | AA_DQB1_38    | 2.88E-51 |
| DQB1     | AA_DQB1_77    | 1.02E-50 |
| DRB1     | AA_DRB1_67    | 3.88E-49 |
| DRB1     | AA_DRB1_13    | 2.09E-45 |
| DRB1     | AA_DRB1_11    | 6.85E-45 |
| DRB1     | AA_DRB1_10    | 1.74E-44 |
| DRB1     | AA_DRB1_149   | 2.02E-44 |
| DRB1     | AA_DRB1_12    | 5.47E-44 |
| B        | AA_B_114      | 1.11E-43 |
| DRB1     | AA_DRB1_-25   | 7.96E-42 |
| DRB1     | AA_DRB1_-16   | 8.23E-42 |
| DRB1     | AA_DRB1_233   | 8.84E-42 |
| B        | AA_B_97       | 2.76E-39 |
| DQA1     | AA_DQA1_52    | 1.25E-37 |
| DPB1     | AA_DPB1_194   | 2.21E-32 |
| HLA_DPB1 | HLA_DPB1_01   | 2.30E-32 |
| HLA_DPB1 | HLA_DPB1_0101 | 2.30E-32 |
| B        | AA_B_74       | 1.65E-30 |
| DQA1     | AA_DQA1_56    | 6.08E-30 |
| DQA1     | AA_DQA1_76    | 6.81E-30 |
| B        | AA_B_180      | 3.20E-28 |
| B        | AA_B_177      | 3.28E-28 |
| DRB1     | AA_DRB1_140   | 4.51E-28 |
| B        | AA_B_131      | 1.05E-27 |
| B        | AA_B_45       | 1.45E-27 |
| DQB1     | AA_DQB1_-18   | 2.06E-27 |
| HLA_A    | HLA_A_0101    | 3.93E-27 |
| DRB1     | AA_DRB1_9     | 4.35E-27 |
| HLA_A    | HLA_A_01      | 8.60E-27 |
| A        | AA_A_158      | 9.32E-27 |
| A        | AA_A_150      | 9.63E-27 |
| B        | AA_B_-21      | 1.07E-26 |
| B        | AA_B_-23      | 1.11E-26 |
| A        | AA_A_67       | 1.17E-26 |
| A        | AA_A_44       | 1.25E-26 |
| C        | AA_C_-9       | 1.60E-26 |
| HLA_C    | HLA_C_07      | 1.62E-26 |
| C        | AA_C_194      | 2.13E-26 |
| C        | AA_C_184      | 2.33E-26 |
| C        | AA_C_339      | 2.77E-26 |

|          |               |          |
|----------|---------------|----------|
| C        | AA_C_326      | 2.82E-26 |
| C        | AA_C_307      | 2.94E-26 |
| C        | AA_C_261      | 2.95E-26 |
| C        | AA_C_273      | 2.98E-26 |
| C        | AA_C_285      | 2.98E-26 |
| C        | AA_C_305      | 2.99E-26 |
| C        | AA_C_295      | 3.47E-26 |
| C        | AA_C_147      | 1.74E-25 |
| C        | AA_C_-17      | 2.03E-25 |
| B        | AA_B_116      | 2.09E-25 |
| C        | AA_C_253      | 3.74E-25 |
| C        | AA_C_267      | 3.76E-25 |
| C        | AA_C_306      | 3.80E-25 |
| A        | AA_A_156      | 5.75E-25 |
| DRB1     | AA_DRB1_86    | 4.69E-24 |
| C        | AA_C_-15      | 5.02E-24 |
| C        | AA_C_152      | 1.27E-21 |
| DRB1     | AA_DRB1_96    | 5.69E-21 |
| HLA_DRB1 | HLA_DRB1_1501 | 1.09E-20 |
| DRB1     | AA_DRB1_-1    | 1.30E-20 |
| DQB1     | AA_DQB1_-5    | 1.64E-20 |
| DQA1     | AA_DQA1_34    | 1.93E-20 |
| DQB1     | AA_DQB1_125   | 2.04E-20 |
| HLA_DRB1 | HLA_DRB1_15   | 3.72E-19 |
| B        | AA_B_24       | 3.73E-19 |
| DQB1     | AA_DQB1_87    | 5.95E-19 |
| B        | AA_B_-10      | 9.53E-19 |
| HLA_DQB1 | HLA_DQB1_03   | 1.30E-18 |
| HLA_DQB1 | HLA_DQB1_06   | 1.66E-18 |
| DRB1     | AA_DRB1_98    | 1.90E-18 |
| DRB1     | AA_DRB1_104   | 1.91E-18 |
| DQA1     | AA_DQA1_215   | 2.51E-18 |
| B        | AA_B_70       | 7.14E-18 |
| HLA_DQB1 | HLA_DQB1_0602 | 1.05E-17 |
| DQB1     | AA_DQB1_203   | 2.64E-17 |
| B        | AA_B_152      | 3.40E-17 |
| B        | AA_B_63       | 3.97E-17 |
| DRB1     | AA_DRB1_70    | 5.95E-17 |
| DPB1     | AA_DPB1_76    | 6.00E-17 |
| B        | AA_B_178      | 6.40E-17 |
| DQA1     | AA_DQA1_11    | 7.01E-17 |
| DQA1     | AA_DQA1_218   | 7.03E-17 |
| DQB1     | AA_DQB1_90    | 7.60E-17 |
| DQB1     | AA_DQB1_89    | 7.60E-17 |
| DQB1     | AA_DQB1_84    | 7.62E-17 |
| DQB1     | AA_DQB1_85    | 7.62E-17 |

|          |               |          |
|----------|---------------|----------|
| DQA1     | AA_DQA1_129   | 7.67E-17 |
| DQB1     | AA_DQB1_220   | 8.77E-17 |
| DQB1     | AA_DQB1_-21   | 8.84E-17 |
| DQB1     | AA_DQB1_221   | 9.06E-17 |
| DQB1     | AA_DQB1_-6    | 1.03E-16 |
| DQB1     | AA_DQB1_-4    | 1.05E-16 |
| DQA1     | AA_DQA1_61    | 1.16E-16 |
| DQB1     | AA_DQB1_53    | 1.19E-16 |
| DQA1     | AA_DQA1_66    | 1.20E-16 |
| DQA1     | AA_DQA1_18    | 1.28E-16 |
| DQA1     | AA_DQA1_45    | 1.28E-16 |
| DQA1     | AA_DQA1_48    | 1.30E-16 |
| HLA_DQA1 | HLA_DQA1_01   | 1.30E-16 |
| DQA1     | AA_DQA1_64    | 1.31E-16 |
| DQA1     | AA_DQA1_55    | 1.32E-16 |
| DQA1     | AA_DQA1_80    | 1.37E-16 |
| DQA1     | AA_DQA1_207   | 1.51E-16 |
| HLA_DPA1 | HLA_DPA1_0201 | 2.14E-16 |
| DRB1     | AA_DRB1_60    | 2.14E-16 |
| DRB1     | AA_DRB1_57    | 2.23E-16 |
| DQA1     | AA_DQA1_69    | 2.25E-16 |
| A        | AA_A_76       | 3.30E-16 |
| DQB1     | AA_DQB1_86    | 3.61E-16 |
| DPA1     | AA_DPA1_83    | 8.75E-16 |
| DPA1     | AA_DPA1_50    | 1.03E-15 |
| HLA_DQA1 | HLA_DQA1_0102 | 1.08E-15 |
| HLA_DPA1 | HLA_DPA1_01   | 1.19E-15 |
| HLA_DPA1 | HLA_DPA1_02   | 1.29E-15 |
| DPA1     | AA_DPA1_31    | 1.30E-15 |
| A        | AA_A_90       | 1.79E-15 |
| A        | AA_A_163      | 1.92E-15 |
| DPA1     | AA_DPA1_228   | 2.85E-15 |
| DPA1     | AA_DPA1_160   | 2.90E-15 |
| DPA1     | AA_DPA1_127   | 2.97E-15 |
| DPA1     | AA_DPA1_111   | 3.73E-15 |
| DRB1     | AA_DRB1_30    | 4.94E-15 |
| B        | AA_B_69       | 6.51E-15 |
| HLA_B    | HLA_B_0702    | 6.91E-15 |
| DQB1     | AA_DQB1_182   | 8.48E-15 |
| DQB1     | AA_DQB1_140   | 9.07E-15 |
| HLA_B    | HLA_B_07      | 9.14E-15 |
| HLA_DPA1 | HLA_DPA1_0103 | 9.46E-15 |
| HLA_C    | HLA_C_0702    | 1.05E-14 |
| C        | AA_C_99       | 1.26E-14 |
| A        | AA_A_152      | 1.28E-14 |
| B        | AA_B_71       | 2.06E-14 |

|          |               |          |
|----------|---------------|----------|
| B        | AA_B_11       | 4.22E-14 |
| DRB1     | AA_DRB1_181   | 5.29E-14 |
| B        | AA_B_12       | 6.01E-14 |
| A        | AA_A_167      | 6.48E-14 |
| A        | AA_A_166      | 6.49E-14 |
| DRB1     | AA_DRB1_4     | 1.28E-13 |
| C        | AA_C_24       | 1.47E-13 |
| DQA1     | AA_DQA1_-16   | 3.15E-13 |
| DRB1     | AA_DRB1_47    | 3.32E-13 |
| DRB1     | AA_DRB1_28    | 5.31E-13 |
| DQB1     | AA_DQB1_70    | 5.39E-13 |
| DRB1     | AA_DRB1_78    | 8.61E-13 |
| DPB1     | AA_DPB1_35    | 9.79E-13 |
| C        | AA_C_9        | 9.87E-13 |
| DRB1     | AA_DRB1_133   | 1.09E-12 |
| DRB1     | AA_DRB1_142   | 1.13E-12 |
| C        | AA_C_304      | 1.20E-12 |
| HLA_DQA1 | HLA_DQA1_02   | 1.72E-12 |
| HLA_DQA1 | HLA_DQA1_0201 | 1.74E-12 |
| DQA1     | AA_DQA1_54    | 1.75E-12 |
| B        | AA_B_95       | 2.09E-12 |
| DRB1     | AA_DRB1_25    | 2.16E-12 |
| DRB1     | AA_DRB1_14    | 2.19E-12 |
| HLA_DRB1 | HLA_DRB1_0701 | 2.22E-12 |
| HLA_DRB1 | HLA_DRB1_07   | 2.23E-12 |
| DPB1     | AA_DPB1_87    | 5.13E-12 |
| DPB1     | AA_DPB1_85    | 5.15E-12 |
| DPB1     | AA_DPB1_86    | 5.20E-12 |
| A        | AA_A_105      | 6.01E-12 |
| DPB1     | AA_DPB1_84    | 6.85E-12 |
| DPB1     | AA_DPB1_96    | 7.64E-12 |
| DPB1     | AA_DPB1_170   | 7.82E-12 |
| C        | AA_C_116      | 2.94E-11 |
| B        | AA_B_-8       | 3.01E-11 |
| B        | AA_B_46       | 3.11E-11 |
| DQB1     | AA_DQB1_9     | 3.88E-11 |
| B        | AA_B_94       | 4.07E-11 |
| DRB1     | AA_DRB1_-17   | 4.23E-11 |
| DPB1     | AA_DPB1_8     | 6.98E-11 |
| C        | AA_C_156      | 8.86E-11 |
| B        | AA_B_-11      | 9.00E-11 |
| DQA1     | AA_DQA1_25    | 2.48E-10 |
| HLA_DRB1 | HLA_DRB1_0401 | 3.93E-10 |
| HLA_DQB1 | HLA_DQB1_0301 | 5.68E-10 |
| DQB1     | AA_DQB1_45    | 6.23E-10 |
| C        | AA_C_77       | 6.50E-10 |



|          |               |          |
|----------|---------------|----------|
| C        | AA_C_80       | 6.50E-10 |
| DPB1     | AA_DPB1_9     | 7.19E-10 |
| C        | AA_C_90       | 8.52E-10 |
| DQB1     | AA_DQB1_167   | 1.02E-09 |
| DQB1     | AA_DQB1_13    | 1.07E-09 |
| HLA_DQB1 | HLA_DQB1_0303 | 2.29E-09 |
| DQB1     | AA_DQB1_26    | 5.67E-09 |
| A        | AA_A_77       | 9.48E-09 |
| B        | AA_B_41       | 1.69E-08 |
| B        | AA_B_325      | 3.91E-08 |
| C        | AA_C_73       | 6.08E-08 |
| HLA_B    | HLA_B_5701    | 8.41E-08 |
| HLA_B    | HLA_B_57      | 1.05E-07 |
| HLA_DPB1 | HLA_DPB1_04   | 1.25E-07 |
| B        | AA_B_81       | 1.50E-07 |
| B        | AA_B_83       | 3.19E-07 |
| B        | AA_B_82       | 3.19E-07 |
| HLA_C    | HLA_C_0602    | 3.60E-07 |
| HLA_C    | HLA_C_06      | 3.60E-07 |
| B        | AA_B_77       | 4.52E-07 |
| A        | AA_A_70       | 5.24E-07 |
| C        | AA_C_97       | 6.27E-07 |
| B        | AA_B_80       | 1.10E-06 |
| C        | AA_C_1        | 1.91E-06 |
| HLA_B    | HLA_B_15      | 2.42E-06 |
| A        | AA_A_321      | 3.46E-06 |
| A        | AA_A_97       | 3.52E-06 |
| A        | AA_A_276      | 3.73E-06 |
| B        | AA_B_32       | 4.20E-06 |
| B        | AA_B_62       | 5.09E-06 |
| C        | AA_C_95       | 6.42E-06 |
| DQB1     | AA_DQB1_135   | 6.72E-06 |

**Table S5 - HLA Imputation in the combined IIM cohort conditional on HLA-DRB1\*03:01**

HLA alleles and amino acids reaching significance ( $p < 6.8 \times 10^{-6}$ ) in the combined IIM analysis (n=2,566)

| Gene     | Allele (HLA) / Amino acid (AA) | P-value  |
|----------|--------------------------------|----------|
| B        | AA_B_9                         | 2.93E-14 |
| HLA_B    | HLA_B_08                       | 3.09E-14 |
| HLA_B    | HLA_B_0801                     | 3.23E-14 |
| DRB1     | AA_DRB1_-1                     | 1.70E-11 |
| B        | AA_B_114                       | 1.73E-11 |
| B        | AA_B_67                        | 1.79E-11 |
| HLA_DRB1 | HLA_DRB1_1501                  | 9.50E-10 |
| HLA_C    | HLA_C_0701                     | 1.90E-09 |
| DRB1     | AA_DRB1_71                     | 5.35E-09 |
| DQB1     | AA_DQB1_71                     | 6.36E-09 |
| B        | AA_B_156                       | 7.49E-09 |
| C        | AA_C_66                        | 9.30E-09 |
| DQB1     | AA_DQB1_26                     | 2.11E-08 |
| HLA_DRB1 | HLA_DRB1_15                    | 2.84E-08 |
| DQB1     | AA_DQB1_74                     | 4.18E-08 |
| HLA_DQB1 | HLA_DQB1_0602                  | 4.95E-08 |
| HLA_DRB1 | HLA_DRB1_16                    | 9.39E-08 |
| HLA_DRB1 | HLA_DRB1_1601                  | 1.57E-07 |
| DRB1     | AA_DRB1_67                     | 2.25E-07 |
| HLA_C    | HLA_C_0702                     | 2.95E-07 |
| B        | AA_B_70                        | 3.34E-07 |
| DRB1     | AA_DRB1_57                     | 3.46E-07 |
| C        | AA_C_99                        | 5.01E-07 |
| B        | AA_B_97                        | 5.67E-07 |
| HLA_B    | HLA_B_0702                     | 6.62E-07 |
| DQB1     | AA_DQB1_126                    | 7.52E-07 |
| HLA_DQB1 | HLA_DQB1_0502                  | 9.02E-07 |
| HLA_B    | HLA_B_07                       | 1.06E-06 |
| DRB1     | AA_DRB1_74                     | 1.77E-06 |
| DQB1     | AA_DQB1_57                     | 1.89E-06 |
| DRB1     | AA_DRB1_-24                    | 1.97E-06 |
| DQB1     | AA_DQB1_75                     | 2.82E-06 |
| DQB1     | AA_DQB1_56                     | 2.82E-06 |
| HLA_DRB1 | HLA_DRB1_08                    | 3.28E-06 |
| HLA_DQB1 | HLA_DQB1_04                    | 4.07E-06 |
| HLA_DQB1 | HLA_DQB1_0402                  | 4.44E-06 |
| DRB1     | AA_DRB1_-25                    | 5.83E-06 |
| DRB1     | AA_DRB1_-16                    | 5.96E-06 |
| DRB1     | AA_DRB1_-17                    | 5.99E-06 |

**Table S6 - HLA Imputation in the combined IIM cohort conditional on HLA-DRB1\*03:01 and HLA-B\*08:01**

HLA alleles and amino acids reaching significance ( $p < 6.8 \times 10^{-6}$ ) in the combined IIM analysis (n=2,566)

| Gene     | Allele (HLA) / Amino acid (AA) | P-value  |
|----------|--------------------------------|----------|
| DRB1     | AA_DRB1_-1                     | 3.06E-11 |
| HLA_DRB1 | HLA_DRB1_1501                  | 1.64E-09 |
| B        | AA_B_97                        | 9.55E-09 |
| DQB1     | AA_DQB1_71                     | 1.15E-08 |
| DRB1     | AA_DRB1_71                     | 1.26E-08 |
| DQB1     | AA_DQB1_26                     | 3.61E-08 |
| HLA_DRB1 | HLA_DRB1_15                    | 4.72E-08 |
| DQB1     | AA_DQB1_74                     | 7.16E-08 |
| HLA_DQB1 | HLA_DQB1_0602                  | 7.43E-08 |
| HLA_DRB1 | HLA_DRB1_16                    | 2.01E-07 |
| HLA_DRB1 | HLA_DRB1_1601                  | 3.32E-07 |
| DRB1     | AA_DRB1_67                     | 3.96E-07 |
| DRB1     | AA_DRB1_57                     | 4.07E-07 |
| DQB1     | AA_DQB1_126                    | 1.38E-06 |
| HLA_DQB1 | HLA_DQB1_0502                  | 1.63E-06 |
| C        | AA_C_99                        | 1.85E-06 |
| DRB1     | AA_DRB1_-24                    | 2.09E-06 |
| DQB1     | AA_DQB1_57                     | 2.68E-06 |
| DRB1     | AA_DRB1_74                     | 2.84E-06 |
| DQB1     | AA_DQB1_75                     | 3.03E-06 |
| DQB1     | AA_DQB1_56                     | 3.87E-06 |
| HLA_DRB1 | HLA_DRB1_08                    | 4.25E-06 |
| B        | AA_B_114                       | 4.48E-06 |
| HLA_DQB1 | HLA_DQB1_04                    | 5.54E-06 |
| HLA_DQB1 | HLA_DQB1_0402                  | 6.03E-06 |

**Table S7 - HLA Imputation in the polymyositis subgroup**

HLA alleles and amino acids reaching significance ( $p < 6.8 \times 10^{-6}$ ) in the polymyositis subgroup analysis (n=931)

| Gene     | Allele (HLA) / Amino acid (AA) | P-value  |
|----------|--------------------------------|----------|
| HLA_DRB1 | HLA_DRB1_03                    | 1.14E-80 |
| DRB1     | AA_DRB1_77                     | 1.65E-80 |
| HLA_DRB1 | HLA_DRB1_0301                  | 6.11E-80 |
| HLA_DQB1 | HLA_DQB1_0201                  | 5.85E-78 |
| DRB1     | AA_DRB1_74                     | 1.27E-75 |
| HLA_B    | HLA_B_08                       | 4.81E-75 |
| HLA_B    | HLA_B_0801                     | 5.44E-75 |
| B        | AA_B_9                         | 4.30E-67 |
| DRB1     | AA_DRB1_26                     | 1.74E-64 |
| HLA_C    | HLA_C_0701                     | 4.41E-51 |
| B        | AA_B_67                        | 6.33E-48 |
| DQA1     | AA_DQA1_50                     | 1.02E-46 |
| DQA1     | AA_DQA1_53                     | 1.02E-46 |
| DQA1     | AA_DQA1_175                    | 1.22E-46 |
| DQA1     | AA_DQA1_47                     | 3.23E-46 |
| C        | AA_C_66                        | 3.74E-46 |
| DQA1     | AA_DQA1_75                     | 4.47E-46 |
| HLA_DQA1 | HLA_DQA1_0501                  | 5.04E-46 |
| HLA_DQA1 | HLA_DQA1_05                    | 5.04E-46 |
| DQA1     | AA_DQA1_107                    | 5.34E-45 |
| DQA1     | AA_DQA1_163                    | 8.62E-45 |
| DQA1     | AA_DQA1_161                    | 8.72E-45 |
| DQA1     | AA_DQA1_156                    | 8.74E-45 |
| DQA1     | AA_DQA1_51                     | 1.39E-44 |
| DQA1     | AA_DQA1_40                     | 1.39E-44 |
| DRB1     | AA_DRB1_32                     | 7.86E-41 |
| DRB1     | AA_DRB1_37                     | 2.20E-40 |
| DQB1     | AA_DQB1_28                     | 1.68E-36 |
| DQB1     | AA_DQB1_47                     | 1.69E-36 |
| DQB1     | AA_DQB1_46                     | 1.69E-36 |
| DQB1     | AA_DQB1_52                     | 1.70E-36 |
| HLA_DQB1 | HLA_DQB1_02                    | 1.73E-36 |
| DRB1     | AA_DRB1_10                     | 3.11E-36 |
| DRB1     | AA_DRB1_13                     | 3.97E-36 |
| DRB1     | AA_DRB1_149                    | 6.24E-36 |
| DQB1     | AA_DQB1_74                     | 8.46E-36 |
| DRB1     | AA_DRB1_11                     | 1.23E-35 |
| B        | AA_B_156                       | 1.29E-35 |
| DRB1     | AA_DRB1_-25                    | 1.55E-35 |
| DRB1     | AA_DRB1_-16                    | 1.58E-35 |

|       |             |          |
|-------|-------------|----------|
| DRB1  | AA_DRB1_12  | 1.68E-35 |
| DQB1  | AA_DQB1_37  | 8.28E-35 |
| DQB1  | AA_DQB1_71  | 9.27E-35 |
| DQB1  | AA_DQB1_55  | 1.20E-34 |
| DQB1  | AA_DQB1_30  | 1.28E-34 |
| DQB1  | AA_DQB1_-10 | 4.16E-34 |
| DRB1  | AA_DRB1_233 | 5.43E-34 |
| DQB1  | AA_DQB1_66  | 2.23E-33 |
| DQB1  | AA_DQB1_67  | 2.24E-33 |
| DRB1  | AA_DRB1_71  | 1.11E-32 |
| B     | AA_B_163    | 6.75E-31 |
| B     | AA_B_97     | 6.68E-30 |
| DRB1  | AA_DRB1_73  | 5.60E-27 |
| DQB1  | AA_DQB1_77  | 2.04E-25 |
| DQB1  | AA_DQB1_75  | 2.41E-25 |
| DQB1  | AA_DQB1_38  | 2.97E-25 |
| DQA1  | AA_DQA1_215 | 1.57E-23 |
| DRB1  | AA_DRB1_98  | 1.80E-23 |
| DRB1  | AA_DRB1_104 | 1.82E-23 |
| DRB1  | AA_DRB1_67  | 5.46E-23 |
| B     | AA_B_45     | 1.59E-22 |
| DQA1  | AA_DQA1_34  | 2.61E-22 |
| B     | AA_B_74     | 1.61E-21 |
| DQA1  | AA_DQA1_52  | 3.78E-21 |
| B     | AA_B_-21    | 4.18E-21 |
| B     | AA_B_-23    | 4.33E-21 |
| DRB1  | AA_DRB1_86  | 1.04E-20 |
| B     | AA_B_114    | 1.32E-20 |
| B     | AA_B_180    | 2.02E-20 |
| B     | AA_B_177    | 2.02E-20 |
| B     | AA_B_63     | 7.38E-20 |
| HLA_C | HLA_C_07    | 9.70E-20 |
| C     | AA_C_-9     | 1.72E-19 |
| B     | AA_B_131    | 1.97E-19 |
| C     | AA_C_194    | 1.99E-19 |
| C     | AA_C_184    | 2.00E-19 |
| DQA1  | AA_DQA1_56  | 2.04E-19 |
| C     | AA_C_339    | 2.08E-19 |
| C     | AA_C_326    | 2.08E-19 |
| C     | AA_C_307    | 2.12E-19 |
| C     | AA_C_305    | 2.14E-19 |
| C     | AA_C_285    | 2.15E-19 |
| C     | AA_C_261    | 2.18E-19 |
| C     | AA_C_273    | 2.19E-19 |
| DQA1  | AA_DQA1_76  | 2.41E-19 |
| C     | AA_C_295    | 2.83E-19 |

|          |               |          |
|----------|---------------|----------|
| DQB1     | AA_DQB1_57    | 3.47E-19 |
| DRB1     | AA_DRB1_47    | 4.22E-19 |
| C        | AA_C_147      | 4.41E-19 |
| C        | AA_C_-17      | 7.70E-19 |
| C        | AA_C_306      | 9.50E-19 |
| C        | AA_C_253      | 9.68E-19 |
| C        | AA_C_267      | 9.76E-19 |
| B        | AA_B_116      | 2.28E-18 |
| DRB1     | AA_DRB1_140   | 1.24E-17 |
| DQB1     | AA_DQB1_-18   | 3.18E-17 |
| DRB1     | AA_DRB1_9     | 5.60E-17 |
| B        | AA_B_24       | 8.16E-17 |
| C        | AA_C_-15      | 1.97E-16 |
| HLA_DPB1 | HLA_DPB1_01   | 3.20E-16 |
| HLA_DPB1 | HLA_DPB1_0101 | 3.20E-16 |
| DPB1     | AA_DPB1_194   | 3.74E-16 |
| C        | AA_C_152      | 1.56E-14 |
| HLA_A    | HLA_A_0101    | 2.10E-14 |
| DRB1     | AA_DRB1_30    | 2.12E-14 |
| HLA_A    | HLA_A_01      | 2.95E-14 |
| A        | AA_A_158      | 2.97E-14 |
| A        | AA_A_150      | 2.99E-14 |
| A        | AA_A_67       | 3.45E-14 |
| A        | AA_A_44       | 3.56E-14 |
| DRB1     | AA_DRB1_96    | 3.83E-14 |
| DRB1     | AA_DRB1_60    | 8.09E-14 |
| DRB1     | AA_DRB1_28    | 1.09E-13 |
| DRB1     | AA_DRB1_4     | 1.59E-13 |
| DRB1     | AA_DRB1_57    | 4.89E-13 |
| B        | AA_B_-10      | 7.64E-13 |
| C        | AA_C_9        | 1.12E-12 |
| A        | AA_A_156      | 1.16E-12 |
| DRB1     | AA_DRB1_181   | 1.36E-12 |
| HLA_DQB1 | HLA_DQB1_03   | 4.66E-12 |
| DRB1     | AA_DRB1_78    | 7.63E-12 |
| DQB1     | AA_DQB1_140   | 7.72E-12 |
| DQB1     | AA_DQB1_182   | 7.90E-12 |
| HLA_DQA1 | HLA_DQA1_02   | 4.01E-11 |
| DQA1     | AA_DQA1_54    | 4.08E-11 |
| HLA_DQA1 | HLA_DQA1_0201 | 4.11E-11 |
| C        | AA_C_90       | 4.41E-11 |
| DRB1     | AA_DRB1_25    | 6.27E-11 |
| DRB1     | AA_DRB1_14    | 6.31E-11 |
| HLA_DRB1 | HLA_DRB1_0701 | 6.52E-11 |
| HLA_DRB1 | HLA_DRB1_07   | 6.57E-11 |
| C        | AA_C_24       | 9.15E-11 |

|          |               |          |
|----------|---------------|----------|
| B        | AA_B_46       | 4.76E-10 |
| DQA1     | AA_DQA1_25    | 7.16E-10 |
| B        | AA_B_41       | 1.08E-09 |
| DQA1     | AA_DQA1_187   | 1.48E-09 |
| C        | AA_C_304      | 2.33E-09 |
| DRB1     | AA_DRB1_70    | 2.62E-09 |
| DRB1     | AA_DRB1_120   | 4.97E-09 |
| C        | AA_C_156      | 5.02E-09 |
| DQB1     | AA_DQB1_185   | 6.83E-09 |
| DQA1     | AA_DQA1_26    | 6.91E-09 |
| HLA_DQA1 | HLA_DQA1_0301 | 6.93E-09 |
| HLA_DQA1 | HLA_DQA1_03   | 6.94E-09 |
| A        | AA_A_166      | 8.39E-09 |
| A        | AA_A_167      | 8.39E-09 |
| C        | AA_C_73       | 1.53E-08 |
| HLA_DRB1 | HLA_DRB1_04   | 3.80E-08 |
| DRB1     | AA_DRB1_33    | 3.93E-08 |
| B        | AA_B_32       | 4.76E-08 |
| DRB1     | AA_DRB1_180   | 5.35E-08 |
| DRB1     | AA_DRB1_-24   | 6.14E-08 |
| DPB1     | AA_DPB1_76    | 8.66E-08 |
| DQB1     | AA_DQB1_135   | 9.07E-08 |
| A        | AA_A_76       | 9.23E-08 |
| HLA_DRB1 | HLA_DRB1_0401 | 1.19E-07 |
| B        | AA_B_178      | 1.20E-07 |
| B        | AA_B_70       | 1.74E-07 |
| B        | AA_B_69       | 1.78E-07 |
| B        | AA_B_152      | 1.86E-07 |
| B        | AA_B_-8       | 2.28E-07 |
| B        | AA_B_-11      | 2.97E-07 |
| B        | AA_B_71       | 4.00E-07 |
| B        | AA_B_83       | 4.30E-07 |
| B        | AA_B_82       | 4.30E-07 |
| HLA_DQB1 | HLA_DQB1_0202 | 6.17E-07 |
| B        | AA_B_12       | 6.59E-07 |
| B        | AA_B_81       | 7.14E-07 |
| B        | AA_B_77       | 1.06E-06 |
| B        | AA_B_11       | 1.07E-06 |
| B        | AA_B_80       | 1.13E-06 |
| HLA_DQB1 | HLA_DQB1_0303 | 1.91E-06 |
| A        | AA_A_90       | 1.94E-06 |
| B        | AA_B_95       | 2.17E-06 |
| B        | AA_B_-16      | 2.40E-06 |
| A        | AA_A_163      | 2.56E-06 |
| C        | AA_C_116      | 2.94E-06 |
| HLA_B    | HLA_B_57      | 4.23E-06 |

|      |             |          |
|------|-------------|----------|
| C    | AA_C_95     | 4.92E-06 |
| DQB1 | AA_DQB1_125 | 5.82E-06 |



**Table S8 - HLA Imputation in the polymyositis subgroup conditional on HLA-DRB1\*03:01**

HLA alleles and amino acids reaching significance ( $p < 6.8 \times 10^{-6}$ ) in the polymyositis subgroup analysis (n=931)

| Gene  | Allele (HLA) / Amino acid (AA) | P-value  |
|-------|--------------------------------|----------|
| B     | AA_B_67                        | 4.44E-12 |
| HLA_B | HLA_B_08                       | 3.92E-09 |
| HLA_B | HLA_B_0801                     | 4.17E-09 |
| B     | AA_B_9                         | 2.45E-08 |
| DQA1  | AA_DQA1_215                    | 8.32E-07 |
| DRB1  | AA_DRB1_98                     | 8.86E-07 |
| DRB1  | AA_DRB1_104                    | 8.89E-07 |
| DRB1  | AA_DRB1_57                     | 1.75E-06 |
| B     | AA_B_45                        | 2.72E-06 |
| DQA1  | AA_DQA1_50                     | 2.87E-06 |
| DQA1  | AA_DQA1_53                     | 2.87E-06 |
| DQA1  | AA_DQA1_47                     | 3.17E-06 |
| C     | AA_C_11                        | 3.59E-06 |
| B     | AA_B_97                        | 5.38E-06 |
| DRB1  | AA_DRB1_60                     | 6.15E-06 |

**Table S9 - HLA Imputation in the polymyositis subgroup conditional on HLA-DRB1\*03:01 and HLA-B\*08:01**

HLA alleles and amino acids reaching significance ( $p < 6.8 \times 10^{-6}$ ) in the polymyositis subgroup analysis (n=931)

| Gene | Allele (HLA) / Amino acid (AA) | P-value  |
|------|--------------------------------|----------|
| C    | AA_C_11                        | 1.17E-07 |
| DQA1 | AA_DQA1_215                    | 1.10E-06 |
| DRB1 | AA_DRB1_98                     | 1.18E-06 |
| DRB1 | AA_DRB1_104                    | 1.18E-06 |
| B    | AA_B_194                       | 2.02E-06 |
| C    | AA_C_9                         | 2.18E-06 |
| DRB1 | AA_DRB1_57                     | 2.28E-06 |
| DQA1 | AA_DQA1_50                     | 3.77E-06 |
| DQA1 | AA_DQA1_53                     | 3.77E-06 |
| DQA1 | AA_DQA1_47                     | 4.25E-06 |
| C    | AA_C_99                        | 4.56E-06 |
| B    | AA_B_67                        | 6.71E-06 |

**Table S10 - HLA Imputation in the dermatomyositis subgroup**

HLA alleles and amino acids reaching significance ( $p < 6.8 \times 10^{-6}$ ) in the dermatomyositis subgroup analysis (n=879)

| Gene     | Allele (HLA) / Amino acid (AA) | P-value  |
|----------|--------------------------------|----------|
| HLA_B    | HLA_B_08                       | 2.43E-42 |
| HLA_B    | HLA_B_0801                     | 2.46E-42 |
| B        | AA_B_9                         | 3.53E-38 |
| HLA_DQB1 | HLA_DQB1_0201                  | 4.97E-38 |
| HLA_DRB1 | HLA_DRB1_0301                  | 6.91E-37 |
| HLA_DRB1 | HLA_DRB1_03                    | 9.78E-37 |
| DRB1     | AA_DRB1_77                     | 1.37E-36 |
| DRB1     | AA_DRB1_74                     | 1.64E-34 |
| HLA_C    | HLA_C_0701                     | 7.35E-34 |
| DQB1     | AA_DQB1_66                     | 5.64E-32 |
| DQB1     | AA_DQB1_67                     | 5.65E-32 |
| DQB1     | AA_DQB1_57                     | 7.61E-32 |
| DRB1     | AA_DRB1_26                     | 1.55E-30 |
| DQB1     | AA_DQB1_71                     | 2.17E-30 |
| DQB1     | AA_DQB1_74                     | 6.69E-30 |
| HLA_DQB1 | HLA_DQB1_02                    | 3.53E-29 |
| DQB1     | AA_DQB1_28                     | 7.89E-29 |
| DQB1     | AA_DQB1_47                     | 7.90E-29 |
| DQB1     | AA_DQB1_46                     | 7.91E-29 |
| DQB1     | AA_DQB1_52                     | 7.94E-29 |
| C        | AA_C_66                        | 3.99E-28 |
| DQB1     | AA_DQB1_37                     | 1.75E-27 |
| DQB1     | AA_DQB1_30                     | 1.25E-26 |
| DQB1     | AA_DQB1_55                     | 2.40E-26 |
| DQB1     | AA_DQB1_-10                    | 2.54E-26 |
| DQB1     | AA_DQB1_75                     | 1.50E-23 |
| DRB1     | AA_DRB1_73                     | 5.46E-23 |
| DQB1     | AA_DQB1_38                     | 1.67E-20 |
| DQB1     | AA_DQB1_77                     | 6.10E-20 |
| B        | AA_B_163                       | 4.58E-19 |
| DRB1     | AA_DRB1_71                     | 7.19E-19 |
| B        | AA_B_156                       | 3.08E-17 |
| B        | AA_B_114                       | 4.74E-17 |
| DRB1     | AA_DRB1_67                     | 2.97E-14 |
| DQB1     | AA_DQB1_-5                     | 1.55E-13 |
| B        | AA_B_74                        | 1.61E-13 |
| DQB1     | AA_DQB1_125                    | 4.47E-13 |
| B        | AA_B_67                        | 6.76E-13 |
| DQA1     | AA_DQA1_50                     | 9.52E-13 |
| DQA1     | AA_DQA1_53                     | 9.68E-13 |
| DRB1     | AA_DRB1_37                     | 1.84E-12 |

|          |               |          |
|----------|---------------|----------|
| DPB1     | AA_DPB1_194   | 2.68E-12 |
| HLA_DPB1 | HLA_DPB1_01   | 2.84E-12 |
| HLA_DPB1 | HLA_DPB1_0101 | 2.84E-12 |
| DQB1     | AA_DQB1_87    | 3.90E-12 |
| DQA1     | AA_DQA1_175   | 5.24E-12 |
| DQA1     | AA_DQA1_47    | 5.61E-12 |
| HLA_DQB1 | HLA_DQB1_06   | 6.52E-12 |
| DQB1     | AA_DQB1_203   | 1.93E-11 |
| DQA1     | AA_DQA1_52    | 3.65E-11 |
| DQA1     | AA_DQA1_11    | 5.10E-11 |
| DQA1     | AA_DQA1_218   | 5.14E-11 |
| DQA1     | AA_DQA1_56    | 6.49E-11 |
| DQA1     | AA_DQA1_76    | 6.51E-11 |
| DQA1     | AA_DQA1_51    | 6.52E-11 |
| DQA1     | AA_DQA1_40    | 6.52E-11 |
| DQB1     | AA_DQB1_220   | 6.56E-11 |
| DQB1     | AA_DQB1_221   | 6.75E-11 |
| DQB1     | AA_DQB1_90    | 7.03E-11 |
| DQB1     | AA_DQB1_89    | 7.04E-11 |
| DQB1     | AA_DQB1_84    | 7.16E-11 |
| DQB1     | AA_DQB1_85    | 7.17E-11 |
| DQA1     | AA_DQA1_61    | 9.26E-11 |
| DQA1     | AA_DQA1_66    | 9.40E-11 |
| DQA1     | AA_DQA1_18    | 9.75E-11 |
| DQA1     | AA_DQA1_45    | 9.76E-11 |
| DQA1     | AA_DQA1_48    | 9.81E-11 |
| HLA_DQA1 | HLA_DQA1_01   | 9.87E-11 |
| DQA1     | AA_DQA1_64    | 9.87E-11 |
| DQA1     | AA_DQA1_55    | 9.88E-11 |
| DQA1     | AA_DQA1_80    | 9.91E-11 |
| DQB1     | AA_DQB1_53    | 1.14E-10 |
| DQB1     | AA_DQB1_-21   | 1.28E-10 |
| DQB1     | AA_DQB1_-6    | 1.56E-10 |
| DQB1     | AA_DQB1_-4    | 1.62E-10 |
| DQA1     | AA_DQA1_69    | 1.97E-10 |
| B        | AA_B_97       | 2.60E-10 |
| DQB1     | AA_DQB1_86    | 5.09E-10 |
| B        | AA_B_180      | 8.23E-10 |
| B        | AA_B_177      | 8.24E-10 |
| DQB1     | AA_DQB1_13    | 9.25E-10 |
| DQB1     | AA_DQB1_167   | 9.63E-10 |
| B        | AA_B_-21      | 1.08E-09 |
| DQB1     | AA_DQB1_45    | 1.09E-09 |
| B        | AA_B_-23      | 1.09E-09 |
| HLA_DQB1 | HLA_DQB1_0301 | 1.10E-09 |
| C        | AA_C_152      | 1.12E-09 |

|          |               |          |
|----------|---------------|----------|
| HLA_DPA1 | HLA_DPA1_0201 | 2.19E-09 |
| C        | AA_C_-9       | 2.22E-09 |
| B        | AA_B_131      | 2.35E-09 |
| HLA_C    | HLA_C_07      | 2.43E-09 |
| C        | AA_C_194      | 2.77E-09 |
| C        | AA_C_184      | 2.89E-09 |
| B        | AA_B_-10      | 2.95E-09 |
| C        | AA_C_295      | 3.14E-09 |
| HLA_DQA1 | HLA_DQA1_0501 | 3.34E-09 |
| DQA1     | AA_DQA1_75    | 3.34E-09 |
| HLA_DQA1 | HLA_DQA1_05   | 3.34E-09 |
| B        | AA_B_45       | 3.36E-09 |
| C        | AA_C_339      | 3.44E-09 |
| C        | AA_C_326      | 3.44E-09 |
| C        | AA_C_261      | 3.47E-09 |
| C        | AA_C_273      | 3.47E-09 |
| C        | AA_C_307      | 3.49E-09 |
| C        | AA_C_285      | 3.50E-09 |
| C        | AA_C_305      | 3.51E-09 |
| DQA1     | AA_DQA1_107   | 5.36E-09 |
| DQA1     | AA_DQA1_163   | 5.43E-09 |
| DQA1     | AA_DQA1_161   | 5.45E-09 |
| DQA1     | AA_DQA1_156   | 5.45E-09 |
| HLA_DRB1 | HLA_DRB1_1501 | 5.88E-09 |
| DQB1     | AA_DQB1_70    | 7.26E-09 |
| DQB1     | AA_DQB1_26    | 7.41E-09 |
| HLA_A    | HLA_A_0101    | 7.53E-09 |
| DRB1     | AA_DRB1_32    | 7.86E-09 |
| HLA_A    | HLA_A_01      | 1.01E-08 |
| A        | AA_A_158      | 1.01E-08 |
| A        | AA_A_150      | 1.03E-08 |
| HLA_DPA1 | HLA_DPA1_02   | 1.07E-08 |
| C        | AA_C_147      | 1.07E-08 |
| DPA1     | AA_DPA1_50    | 1.07E-08 |
| DPA1     | AA_DPA1_31    | 1.08E-08 |
| A        | AA_A_67       | 1.09E-08 |
| DQA1     | AA_DQA1_-16   | 1.11E-08 |
| C        | AA_C_-17      | 1.11E-08 |
| A        | AA_A_44       | 1.14E-08 |
| HLA_DPA1 | HLA_DPA1_01   | 1.19E-08 |
| DRB1     | AA_DRB1_-1    | 1.32E-08 |
| DPA1     | AA_DPA1_83    | 1.39E-08 |
| C        | AA_C_99       | 1.53E-08 |
| C        | AA_C_253      | 1.73E-08 |
| C        | AA_C_267      | 1.73E-08 |
| C        | AA_C_306      | 1.75E-08 |

|          |               |          |
|----------|---------------|----------|
| DQA1     | AA_DQA1_129   | 2.25E-08 |
| DPA1     | AA_DPA1_228   | 2.37E-08 |
| DPA1     | AA_DPA1_160   | 2.44E-08 |
| DPA1     | AA_DPA1_127   | 2.47E-08 |
| DPA1     | AA_DPA1_111   | 2.48E-08 |
| HLA_DQB1 | HLA_DQB1_0602 | 2.98E-08 |
| HLA_DRB1 | HLA_DRB1_15   | 3.08E-08 |
| DRB1     | AA_DRB1_58    | 1.14E-07 |
| HLA_DPA1 | HLA_DPA1_0103 | 1.24E-07 |
| DPB1     | AA_DPB1_87    | 1.30E-07 |
| DPB1     | AA_DPB1_85    | 1.31E-07 |
| DPB1     | AA_DPB1_86    | 1.35E-07 |
| DPB1     | AA_DPB1_84    | 1.74E-07 |
| DPB1     | AA_DPB1_76    | 1.99E-07 |
| HLA_C    | HLA_C_0702    | 2.74E-07 |
| A        | AA_A_156      | 2.90E-07 |
| DPB1     | AA_DPB1_8     | 2.94E-07 |
| B        | AA_B_24       | 3.41E-07 |
| DQA1     | AA_DQA1_207   | 3.85E-07 |
| C        | AA_C_77       | 4.72E-07 |
| C        | AA_C_80       | 4.72E-07 |
| HLA_B    | HLA_B_0702    | 5.37E-07 |
| B        | AA_B_116      | 5.38E-07 |
| HLA_DRB1 | HLA_DRB1_11   | 5.89E-07 |
| HLA_B    | HLA_B_07      | 7.41E-07 |
| A        | AA_A_90       | 8.12E-07 |
| C        | AA_C_-15      | 8.98E-07 |
| DPB1     | AA_DPB1_170   | 9.28E-07 |
| DPB1     | AA_DPB1_96    | 9.29E-07 |
| HLA_DQA1 | HLA_DQA1_0102 | 9.54E-07 |
| A        | AA_A_163      | 1.31E-06 |
| B        | AA_B_11       | 1.48E-06 |
| A        | AA_A_76       | 1.74E-06 |
| DPB1     | AA_DPB1_35    | 1.94E-06 |
| B        | AA_B_95       | 2.29E-06 |
| DPB1     | AA_DPB1_9     | 2.58E-06 |
| B        | AA_B_-8       | 3.04E-06 |
| B        | AA_B_70       | 3.40E-06 |
| DQB1     | AA_DQB1_-18   | 4.94E-06 |
| B        | AA_B_152      | 5.31E-06 |
| A        | AA_A_152      | 5.44E-06 |
| B        | AA_B_325      | 6.15E-06 |
| B        | AA_B_178      | 6.32E-06 |

**Table S11 - HLA Imputation in the dermatomyositis subgroup conditional on HLA-B\*08:01**

HLA alleles and amino acids reaching significance ( $p < 6.8 \times 10^{-6}$ ) in the dermatomyositis subgroup analysis (n=879)

| Gene     | Allele (HLA) / Amino acid (AA) | P-value  |
|----------|--------------------------------|----------|
| DQB1     | AA_DQB1_57                     | 8.95E-14 |
| DQB1     | AA_DQB1_71                     | 7.03E-10 |
| DQB1     | AA_DQB1_66                     | 1.23E-09 |
| DQB1     | AA_DQB1_67                     | 1.23E-09 |
| DQB1     | AA_DQB1_75                     | 1.64E-09 |
| DQB1     | AA_DQB1_74                     | 3.59E-09 |
| HLA_DQB1 | HLA_DQB1_06                    | 1.80E-07 |
| DRB1     | AA_DRB1_47                     | 1.85E-07 |
| DQB1     | AA_DQB1_-5                     | 4.17E-07 |
| DQB1     | AA_DQB1_38                     | 4.42E-07 |
| DQB1     | AA_DQB1_125                    | 1.19E-06 |
| DQB1     | AA_DQB1_77                     | 1.34E-06 |
| HLA_DQB1 | HLA_DQB1_02                    | 1.41E-06 |
| HLA_DRB1 | HLA_DRB1_1501                  | 1.64E-06 |
| DRB1     | AA_DRB1_74                     | 1.68E-06 |
| DQB1     | AA_DQB1_47                     | 2.14E-06 |
| DQB1     | AA_DQB1_28                     | 2.14E-06 |
| DQB1     | AA_DQB1_37                     | 2.14E-06 |
| DQB1     | AA_DQB1_46                     | 2.14E-06 |
| DQB1     | AA_DQB1_52                     | 2.14E-06 |
| DRB1     | AA_DRB1_-1                     | 4.67E-06 |
| HLA_DQB1 | HLA_DQB1_0602                  | 4.69E-06 |

**Table S12 - HLA Imputation in the dermatomyositis subgroup conditional on HLA-B\*08:01 and HLA-DQB1 amino acid 57**

HLA alleles and amino acids reaching significance ( $p < 6.8 \times 10^{-6}$ ) in the dermatomyositis subgroup analysis (n=879)

| Gene     | Allele (HLA) / Amino acid (AA) | P-value  |
|----------|--------------------------------|----------|
| DQB1     | AA_DQB1_56                     | 1.23E-06 |
| HLA_DQB1 | HLA_DQB1_0402                  | 2.01E-06 |
| HLA_DQB1 | HLA_DQB1_04                    | 2.26E-06 |



**Table S13 - HLA Imputation in the juvenile dermatomyositis subgroup**  
 HLA alleles and amino acids reaching significance ( $p < 6.8 \times 10^{-6}$ ) in the juvenile dermatomyositis subgroup analysis (n=481)

| Gene     | Allele (HLA) / Amino acid (AA) | P-value  |
|----------|--------------------------------|----------|
| DRB1     | AA_DRB1_77                     | 4.26E-14 |
| HLA_DRB1 | HLA_DRB1_03                    | 4.58E-14 |
| HLA_DRB1 | HLA_DRB1_0301                  | 7.91E-14 |
| HLA_DQB1 | HLA_DQB1_0201                  | 3.34E-13 |
| DRB1     | AA_DRB1_74                     | 2.26E-12 |
| DRB1     | AA_DRB1_37                     | 4.76E-12 |
| DRB1     | AA_DRB1_71                     | 6.82E-12 |
| DRB1     | AA_DRB1_26                     | 9.55E-12 |
| DRB1     | AA_DRB1_140                    | 5.23E-11 |
| DQA1     | AA_DQA1_52                     | 1.36E-10 |
| DQA1     | AA_DQA1_47                     | 2.51E-10 |
| DRB1     | AA_DRB1_9                      | 3.06E-10 |
| B        | AA_B_9                         | 8.40E-10 |
| DPB1     | AA_DPB1_194                    | 1.59E-09 |
| HLA_DPB1 | HLA_DPB1_01                    | 1.74E-09 |
| HLA_DPB1 | HLA_DPB1_0101                  | 1.74E-09 |
| DQA1     | AA_DQA1_50                     | 4.11E-09 |
| DQA1     | AA_DQA1_53                     | 4.11E-09 |
| HLA_B    | HLA_B_0801                     | 7.20E-09 |
| HLA_B    | HLA_B_08                       | 7.24E-09 |
| DQA1     | AA_DQA1_51                     | 1.14E-08 |
| DQA1     | AA_DQA1_40                     | 1.14E-08 |
| DQA1     | AA_DQA1_175                    | 1.25E-08 |
| DRB1     | AA_DRB1_13                     | 1.54E-08 |
| DRB1     | AA_DRB1_11                     | 1.84E-08 |
| DQA1     | AA_DQA1_129                    | 1.92E-08 |
| DQB1     | AA_DQB1_67                     | 2.69E-08 |
| DQB1     | AA_DQB1_66                     | 2.69E-08 |
| DQB1     | AA_DQB1_57                     | 4.71E-08 |
| DRB1     | AA_DRB1_-17                    | 7.13E-08 |
| DQB1     | AA_DQB1_71                     | 9.22E-08 |
| DQB1     | AA_DQB1_55                     | 9.33E-08 |
| HLA_DQA1 | HLA_DQA1_0501                  | 1.11E-07 |
| HLA_DQA1 | HLA_DQA1_05                    | 1.11E-07 |
| DQA1     | AA_DQA1_75                     | 1.12E-07 |
| DQB1     | AA_DQB1_28                     | 1.29E-07 |
| DQB1     | AA_DQB1_46                     | 1.29E-07 |
| DQB1     | AA_DQB1_52                     | 1.29E-07 |
| DQB1     | AA_DQB1_47                     | 1.30E-07 |
| HLA_DQB1 | HLA_DQB1_02                    | 1.33E-07 |
| DQA1     | AA_DQA1_107                    | 1.89E-07 |

|          |             |          |
|----------|-------------|----------|
| DQA1     | AA_DQA1_163 | 1.91E-07 |
| DQA1     | AA_DQA1_161 | 1.92E-07 |
| DQA1     | AA_DQA1_156 | 1.92E-07 |
| DQA1     | AA_DQA1_11  | 1.99E-07 |
| DQA1     | AA_DQA1_218 | 1.99E-07 |
| DRB1     | AA_DRB1_32  | 2.12E-07 |
| DQB1     | AA_DQB1_37  | 2.52E-07 |
| DQB1     | AA_DQB1_89  | 2.53E-07 |
| DQB1     | AA_DQB1_85  | 2.53E-07 |
| DQB1     | AA_DQB1_84  | 2.54E-07 |
| DQB1     | AA_DQB1_90  | 2.55E-07 |
| DQB1     | AA_DQB1_220 | 2.66E-07 |
| DQB1     | AA_DQB1_221 | 2.70E-07 |
| DQB1     | AA_DQB1_53  | 3.01E-07 |
| DQA1     | AA_DQA1_61  | 3.09E-07 |
| DQA1     | AA_DQA1_66  | 3.13E-07 |
| DQA1     | AA_DQA1_18  | 3.20E-07 |
| HLA_DQA1 | HLA_DQA1_01 | 3.20E-07 |
| DQA1     | AA_DQA1_45  | 3.20E-07 |
| DQA1     | AA_DQA1_48  | 3.21E-07 |
| DQA1     | AA_DQA1_64  | 3.22E-07 |
| DQA1     | AA_DQA1_55  | 3.22E-07 |
| DQA1     | AA_DQA1_80  | 3.22E-07 |
| DQB1     | AA_DQB1_203 | 3.49E-07 |
| B        | AA_B_114    | 3.80E-07 |
| C        | AA_C_16     | 3.84E-07 |
| DQB1     | AA_DQB1_30  | 5.94E-07 |
| DQB1     | AA_DQB1_74  | 7.25E-07 |
| HLA_C    | HLA_C_0202  | 7.53E-07 |
| HLA_C    | HLA_C_02    | 7.53E-07 |
| DQA1     | AA_DQA1_69  | 9.22E-07 |
| B        | AA_B_156    | 9.73E-07 |
| DQB1     | AA_DQB1_86  | 1.06E-06 |
| DQB1     | AA_DQB1_125 | 1.08E-06 |
| DQA1     | AA_DQA1_56  | 1.32E-06 |
| DQA1     | AA_DQA1_76  | 1.32E-06 |
| DQB1     | AA_DQB1_87  | 1.56E-06 |
| DQB1     | AA_DQB1_-10 | 1.62E-06 |
| DQB1     | AA_DQB1_-4  | 1.66E-06 |
| DRB1     | AA_DRB1_12  | 1.67E-06 |
| DQB1     | AA_DQB1_-6  | 1.70E-06 |
| DQB1     | AA_DQB1_-21 | 1.71E-06 |
| DRB1     | AA_DRB1_10  | 1.76E-06 |
| DRB1     | AA_DRB1_149 | 1.92E-06 |
| DQB1     | AA_DQB1_70  | 1.99E-06 |
| DRB1     | AA_DRB1_-16 | 2.40E-06 |

|          |               |          |
|----------|---------------|----------|
| DRB1     | AA_DRB1_-25   | 2.40E-06 |
| DRB1     | AA_DRB1_96    | 4.04E-06 |
| C        | AA_C_211      | 4.22E-06 |
| DQA1     | AA_DQA1_-16   | 4.22E-06 |
| HLA_DPA1 | HLA_DPA1_0103 | 4.74E-06 |
| DQB1     | AA_DQB1_-5    | 5.44E-06 |
| HLA_C    | HLA_C_0701    | 5.88E-06 |

**Table S14 - HLA Imputation in the juvenile dermatomyositis subgroup conditional on HLA-DRB1\*03:01**

HLA alleles and amino acids reaching significance ( $p < 6.8 \times 10^{-6}$ ) in the juvenile dermatomyositis subgroup analysis (n=481)

| Gene  | Allele (HLA) / Amino acid (AA) | P-value  |
|-------|--------------------------------|----------|
| C     | AA_C_16                        | 1.75E-07 |
| C     | AA_C_211                       | 3.27E-07 |
| HLA_C | HLA_C_0202                     | 3.28E-07 |
| HLA_C | HLA_C_02                       | 3.28E-07 |
| DRB1  | AA_DRB1_-24                    | 8.20E-07 |
| C     | AA_C_163                       | 1.53E-06 |

**Table S15 - HLA Imputation in the juvenile dermatomyositis subgroup conditional on HLA-DRB1\*03:01 and HLA-C\*02:02**

HLA alleles and amino acids reaching significance ( $p < 6.8 \times 10^{-6}$ ) in the juvenile dermatomyositis subgroup analysis (n=481)

| Gene | Allele (HLA) / Amino acid (AA) | P-value  |
|------|--------------------------------|----------|
| DRB1 | AA_DRB1_-24                    | 8.97E-07 |

## Supplementary References

- 1 Eyre S, Bowes J, Diogo D, Lee A, Barton A, Martin P, *et al.* High-density genetic mapping identifies new susceptibility loci for rheumatoid arthritis. *Nat Genet* 2012;**44**:1336-40.
- 2 WTCCC *et al.* Genome-wide association study of 14,000 cases of seven common diseases and 3,000 shared controls. *Nature* 2007;**447**:661-78.
- 3 Beecham AH, Patsopoulos NA, Xifara DK, Davis MF, Kempainen A, Cotsapas C, *et al.* Analysis of immune-related loci identifies 48 new susceptibility variants for multiple sclerosis. *Nat Genet* 2013;**45**:1353-60.
- 4 Trynka G, Hunt KA, Bockett NA, Romanos J, Mistry V, Szperl A, *et al.* Dense genotyping identifies and localizes multiple common and rare variant association signals in celiac disease. *Nat Genet* 2011;**43**:1193-201.
- 5 Ellinghaus D, Baurecht H, Esparza-Gordillo J, Rodriguez E, Matanovic A, Marenholz I, *et al.* High-density genotyping study identifies four new susceptibility loci for atopic dermatitis. *Nat Genet* 2013;**45**:808-12.
- 6 Patterson N, Price AL, Reich D. Population structure and eigenanalysis. *PLoS Genet* 2006;**2**:e190.
- 7 Price AL, Patterson NJ, Plenge RM, Weinblatt ME, Shadick NA, Reich D. Principal components analysis corrects for stratification in genome-wide association studies. *Nat Genet* 2006;**38**:904-9.
- 8 Boyle AP, Hong EL, Hariharan M, Cheng Y, Schaub MA, Kasowski M, *et al.* Annotation of functional variation in personal genomes using RegulomeDB. *Genome Res* 2012;**22**:1790-7.

- 9 Yang TP, Beazley C, Montgomery SB, Dimas AS, Gutierrez-Arcelus M, Stranger BE, *et al.* Genevar: a database and Java application for the analysis and visualization of SNP-gene associations in eQTL studies. *Bioinformatics* 2010;**26**:2474-6.
- 10 Adzhubei I, Jordan DM, Sunyaev SR. Predicting functional effect of human missense mutations using PolyPhen-2. *Curr Protoc Hum Genet* 2013;**Chapter 7**:Unit7.
- 11 Kumar P, Henikoff S, Ng PC. Predicting the effects of coding non-synonymous variants on protein function using the SIFT algorithm. *Nat Protoc* 2009;**4**:1073-81.
- 12 Siepel A, Bejerano G, Pedersen JS, Hinrichs AS, Hou M, Rosenbloom K, *et al.* Evolutionarily conserved elements in vertebrate, insect, worm, and yeast genomes. *Genome Res* 2005;**15**:1034-50.
- 13 Jia X, Han B, Onengut-Gumuscu S, Chen WM, Concannon PJ, Rich SS, *et al.* Imputing amino acid polymorphisms in human leukocyte antigens. *PLoS One* 2013;**8**:e64683.
- 14 Okada Y, Han B, Tsoi LC, Stuart PE, Ellinghaus E, Tejasvi T, *et al.* Fine mapping major histocompatibility complex associations in psoriasis and its clinical subtypes. *Am J Hum Genet* 2014;**95**:162-72.
- 15 Gateva V, Sandling JK, Hom G, Taylor KE, Chung SA, Sun X, *et al.* A large-scale replication study identifies TNIP1, PRDM1, JAZF1, UHRF1BP1 and IL10 as risk loci for systemic lupus erythematosus. *Nat Genet* 2009;**41**:1228-33.
- 16 Jostins L, Ripke S, Weersma RK, Duerr RH, McGovern DP, Hui KY, *et al.* Host-microbe interactions have shaped the genetic architecture of inflammatory bowel disease. *Nature* 2012;**491**:119-24.

- 17 Hinks A, Cobb J, Marion MC, Prahalad S, Sudman M, Bowes J, *et al.* Dense genotyping of immune-related disease regions identifies 14 new susceptibility loci for juvenile idiopathic arthritis. *Nat Genet* 2013;**45**:664-9.
- 18 Cooper JD, Simmonds MJ, Walker NM, Burren O, Brand OJ, Guo H, *et al.* Seven newly identified loci for autoimmune thyroid disease. *Hum Mol Genet* 2012;**21**:5202-8.
- 19 Bradfield JP, Qu HQ, Wang K, Zhang H, Sleiman PM, Kim CE, *et al.* A genome-wide meta-analysis of six type 1 diabetes cohorts identifies multiple associated loci. *PLoS Genet* 2011;**7**:e1002293.
- 20 Mayes MD, Bossini-Castillo L, Gorlova O, Martin JE, Zhou X, Chen WV, *et al.* Immunochip analysis identifies multiple susceptibility loci for systemic sclerosis. *Am J Hum Genet* 2014;**94**:47-61.
- 21 Okada Y, Wu D, Trynka G, Raj T, Terao C, Ikari K, *et al.* Genetics of rheumatoid arthritis contributes to biology and drug discovery. *Nature* 2014;**506**:376-81.
- 22 Jin Y, Birlea SA, Fain PR, Ferrara TM, Ben S, Riccardi SL, *et al.* Genome-wide association analyses identify 13 new susceptibility loci for generalized vitiligo. *Nat Genet* 2012;**44**:676-80.
- 23 Tsoi LC, Spain SL, Knight J, Ellinghaus E, Stuart PE, Capon F, *et al.* Identification of 15 new psoriasis susceptibility loci highlights the role of innate immunity. *Nat Genet* 2012;**44**:1341-8.
- 24 Stahl EA, Raychaudhuri S, Remmers EF, Xie G, Eyre S, Thomson BP, *et al.* Genome-wide association study meta-analysis identifies seven new rheumatoid arthritis risk loci. *Nat Genet* 2010;**42**:508-14.
- 25 Liu JZ, Almarri MA, Gaffney DJ, Mells GF, Jostins L, Cordell HJ, *et al.* Dense fine-mapping study identifies new susceptibility loci for primary biliary cirrhosis. *Nat Genet* 2012;**44**:1137-41.



- 26 Armstrong DL, Zidovetzki R, arcon-Riquelme ME, Tsao BP, Criswell LA, Kimberly RP, *et al.* GWAS identifies novel SLE susceptibility genes and explains the association of the HLA region. *Genes Immun* 2014;**15**:347-54.
- 27 Liu JZ, Hov JR, Folseraas T, Ellinghaus E, Rushbrook SM, Doncheva NT, *et al.* Dense genotyping of immune-related disease regions identifies nine new risk loci for primary sclerosing cholangitis. *Nat Genet* 2013;**45**:670-5.
- 28 Lessard CJ, Li H, Adrianto I, Ice JA, Rasmussen A, Grundahl KM, *et al.* Variants at multiple loci implicated in both innate and adaptive immune responses are associated with Sjogren's syndrome. *Nat Genet* 2013;**45**:1284-92.
- 29 Barrett JC, Clayton DG, Concannon P, Akolkar B, Cooper JD, Erlich HA, *et al.* Genome-wide association study and meta-analysis find that over 40 loci affect risk of type 1 diabetes. *Nat Genet* 2009;**41**:703-7.
- 30 Sawcer S, Hellenthal G, Pirinen M, Spencer CC, Patsopoulos NA, Moutsianas L, *et al.* Genetic risk and a primary role for cell-mediated immune mechanisms in multiple sclerosis. *Nature* 2011;**476**:214-9.
- 31 Dubois PC, Trynka G, Franke L, Hunt KA, Romanos J, Curtotti A, *et al.* Multiple common variants for celiac disease influencing immune gene expression. *Nat Genet* 2010;**42**:295-302.
- 32 Anderson CA, Boucher G, Lees CW, Franke A, D'Amato M, Taylor KD, *et al.* Meta-analysis identifies 29 additional ulcerative colitis risk loci, increasing the number of confirmed associations to 47. *Nat Genet* 2011;**43**:246-52.
- 33 Onengut-Gumuscu S, Chen WM, Burren O, Cooper NJ, Quinlan AR, Mychaleckyj JC, *et al.* Fine mapping of type 1 diabetes susceptibility loci and evidence for colocalization of causal variants with lymphoid gene enhancers. *Nat Genet* 2015;**47**:381-6.
